# Supplementary material for: Photochemistry and Photophysics of Cholesta-5,7,9(11)-trien-3β-ol in Ethanol
Source: MDPI journal article supplement (doi:10.3390/molecules28104086), 2023-05-14
Supplement: s1 [file s1]

## Photochemistry and Photophysics of Cholesta-5,7,9(11)-trien-3 $\beta$ -ol in Ethanol

Jack Saltiel \*, Sumesh B. Krishnan, Shipra Gupta, Anjan Chakraborty,  
Edwin F. Hilinski and Xinsong Lin

Department of Chemistry and Biochemistry, Florida State University,  
Tallahassee, FL 32306-4390, USA

**Supporting Information:** Figure S1,  $^1\text{H}$  NMR spectrum of the final product mixture from the irradiation of HOCTL in Ar outgassed ethanol. Figure S2, the UV spectrum of HOE<sub>2</sub>. Figures S3-S6,  $^1\text{H}$  NMR spectra of HOD<sub>1</sub>, HOD<sub>2</sub>, HOE<sub>1</sub> and HOE<sub>2</sub>, respectively. Figure S7, COSY  $^1\text{H}$  NMR spectrum of HOE<sub>1</sub>. Figure S8, NOESY  $^1\text{H}$  NMR spectrum of HOE<sub>1</sub>. Figure S9, Expanded region of Figure S7 showing the correlation between the vinyl H at C<sub>11</sub> and the H-6 proton. Figure S10, NOESY  $^1\text{H}$  NMR spectrum of HOE<sub>1</sub> in CD<sub>3</sub>OD. Figure S11,  $^1\text{H}$  NMR spectrum of HOPR<sub>2</sub> in CD<sub>3</sub>Cl. Figure S12, Time evolution of UV spectra from the 313 nm irradiation of CTL in ethanol. Figure S13, Combination coefficient plot for the spectra in Figure S12. X-ray structures: Tables S1-S7 of X-ray data consisting of crystallographic parameters, positional parameters, bond distances, bond angles, and torsional angles for HOCTL. Tables S8-S14 and Tables S15-S21 for HOCTLP and HOPR<sub>2</sub>, respectively. Table S22, Hydrogen Atom Coordinates ( $\text{\AA} \times 10^4$ ) and Isotropic Displacement Parameters ( $\text{\AA}^2 \times 10^3$ ) for HOPR<sub>2</sub>. Reference [1] in Supporting Information is cited as reference [20] in the manuscript.

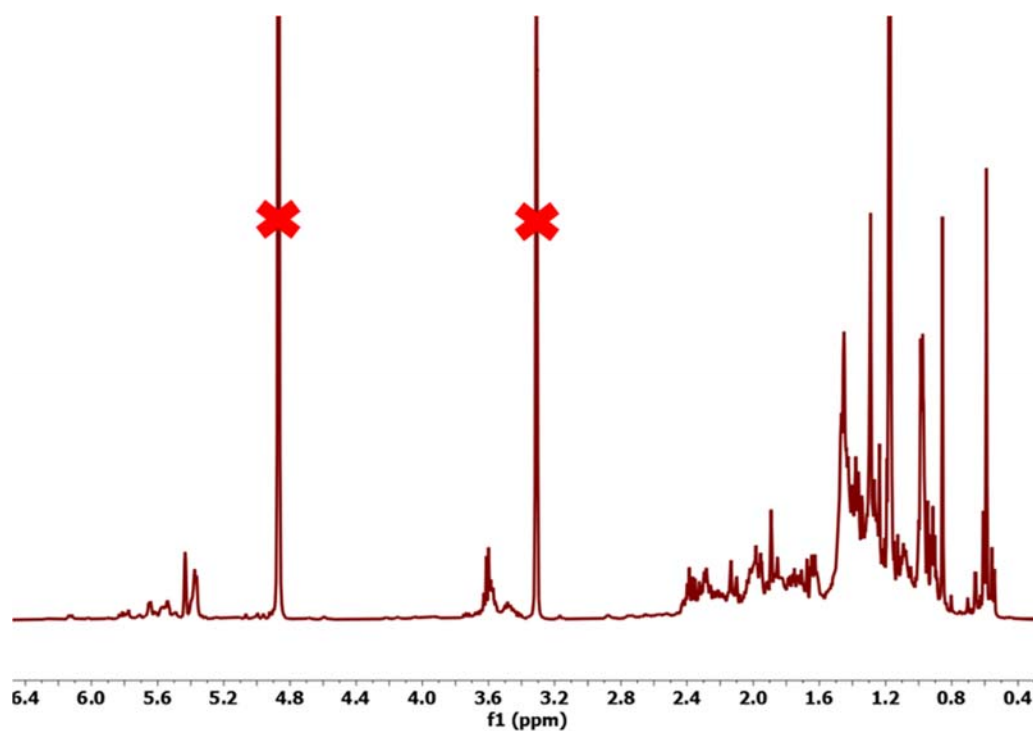

**Figure S1.**  $^1\text{H}$  NMR spectrum in  $\text{CD}_3\text{OD}$  of photoproduct mixture from the irradiation of HOCTL in Ar outgassed ethanol. The crossed out peaks belong to partially protonated solvent.

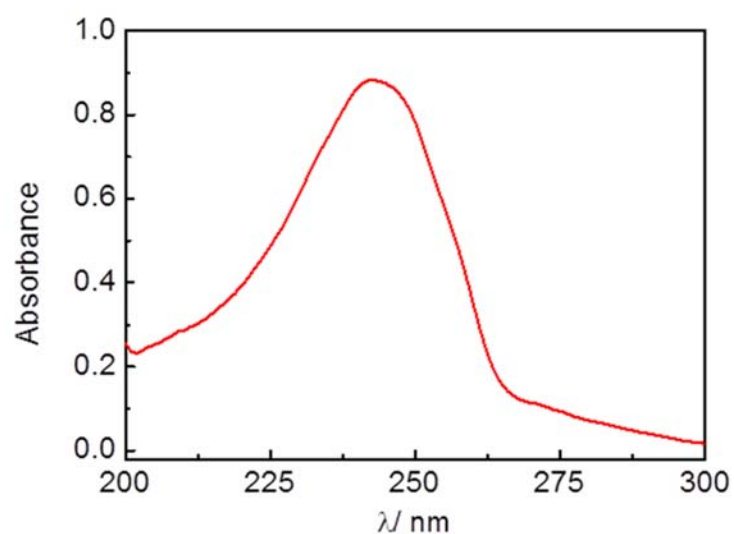

**Figure S2.** The UV spectrum of  $\text{HOE}_2$ .

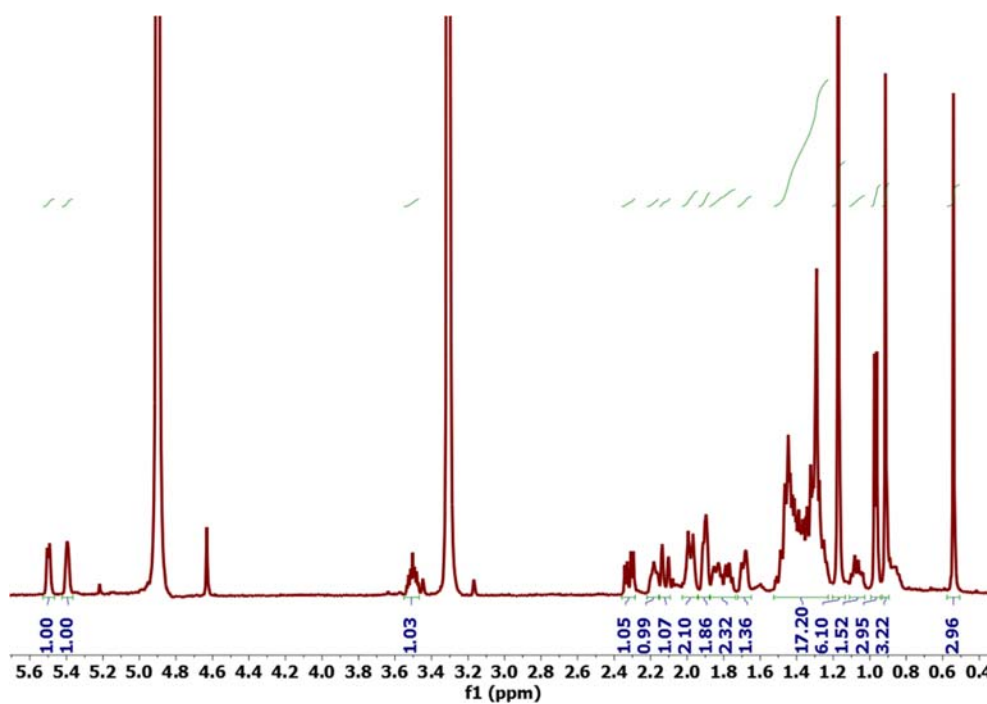

**Figure S3.** <sup>1</sup>H NMR spectrum of HOD<sub>1</sub>, in CD<sub>3</sub>OD.

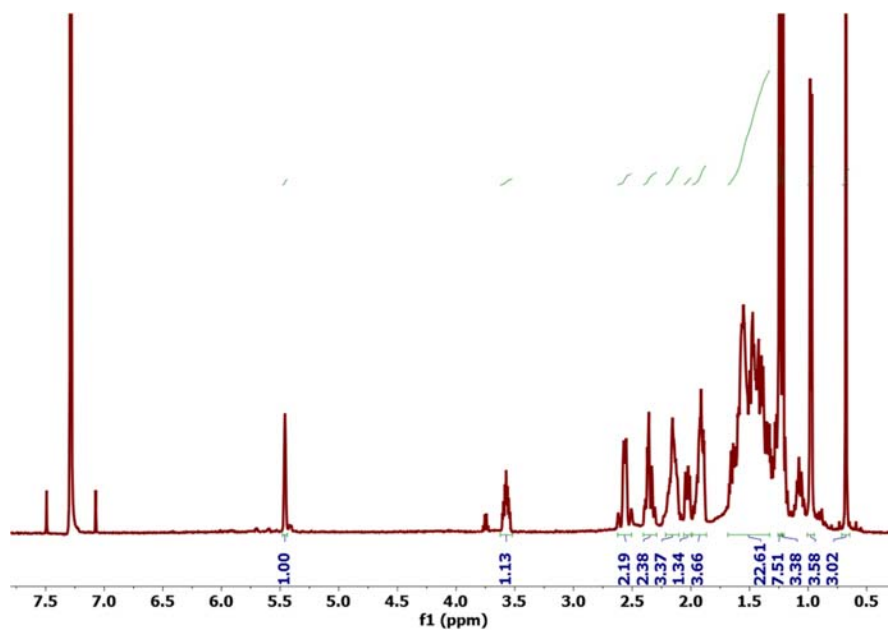

**Figure S4.** <sup>1</sup>H NMR spectrum of HOD<sub>2</sub>, in CDCl<sub>3</sub>.

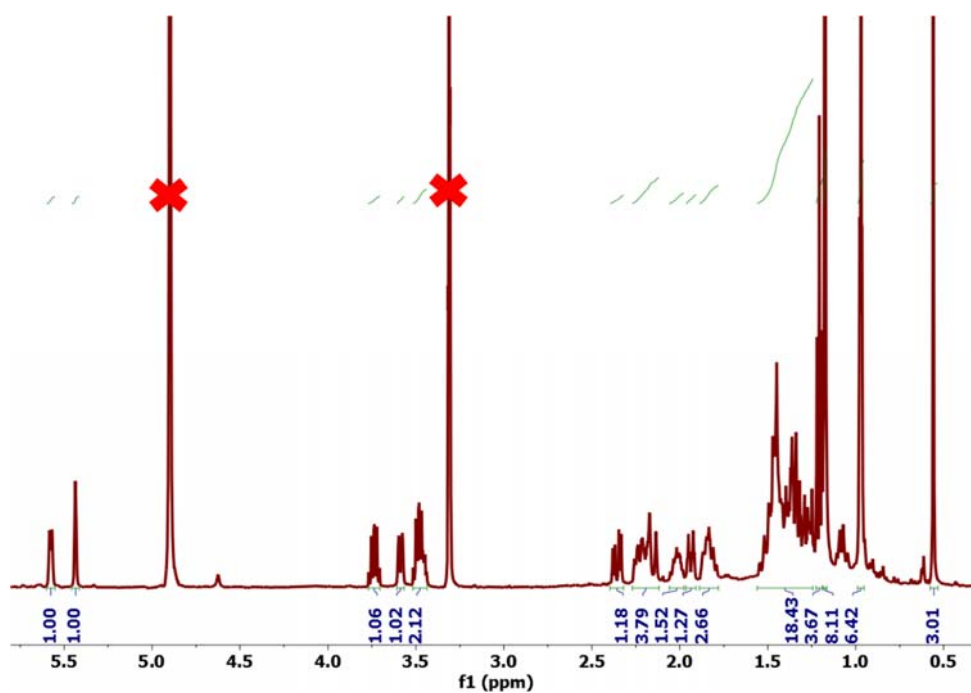

Figure S5.  $^1\text{H}$  NMR spectrum of  $\text{HOE}_1$  in  $\text{CD}_3\text{OD}$ .

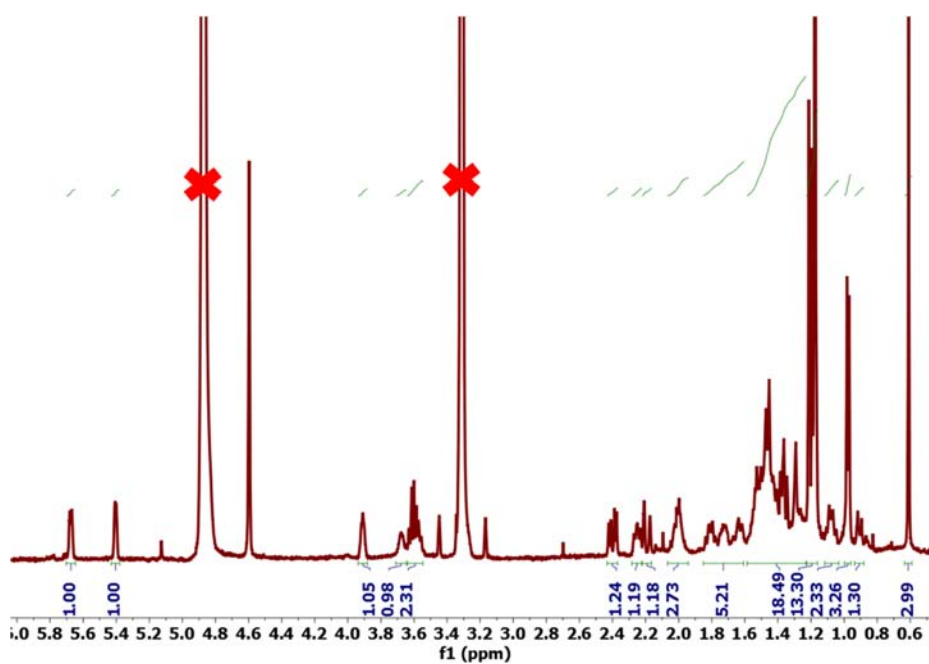

Figure S6.  $^1\text{H}$  NMR spectrum of  $\text{HOE}_2$  in  $\text{CD}_3\text{OD}$ .

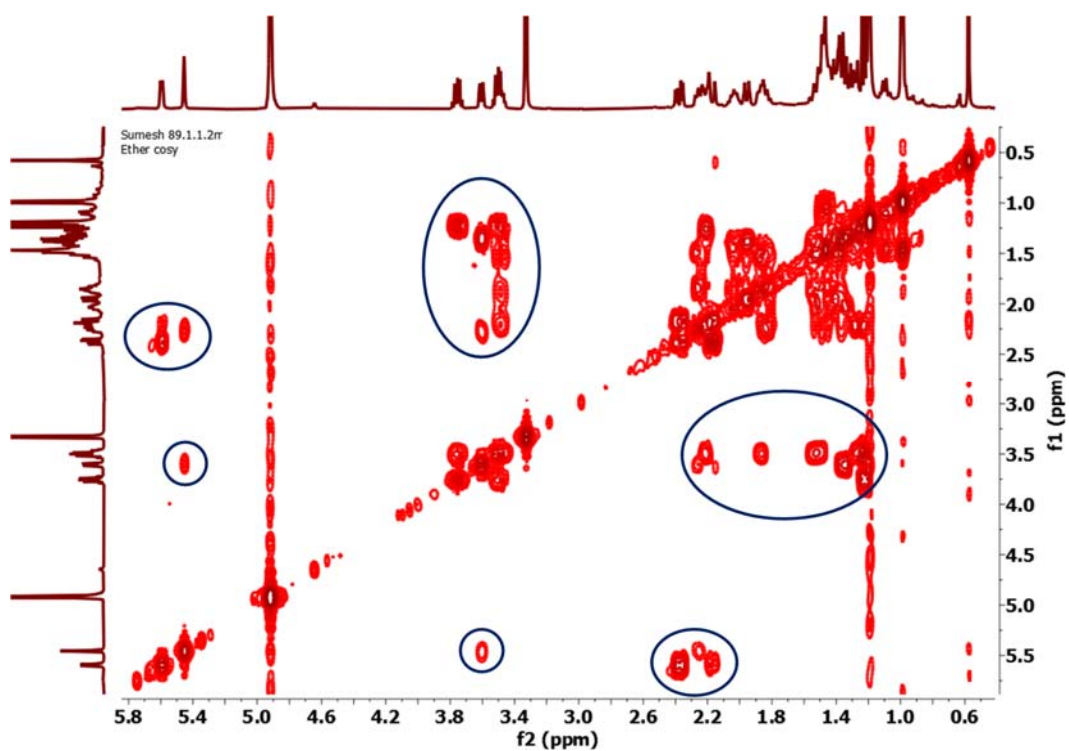

**Figure S7.** COSY  $^1\text{H}$  NMR spectrum of HOE<sub>1</sub> in CD<sub>3</sub>OD.

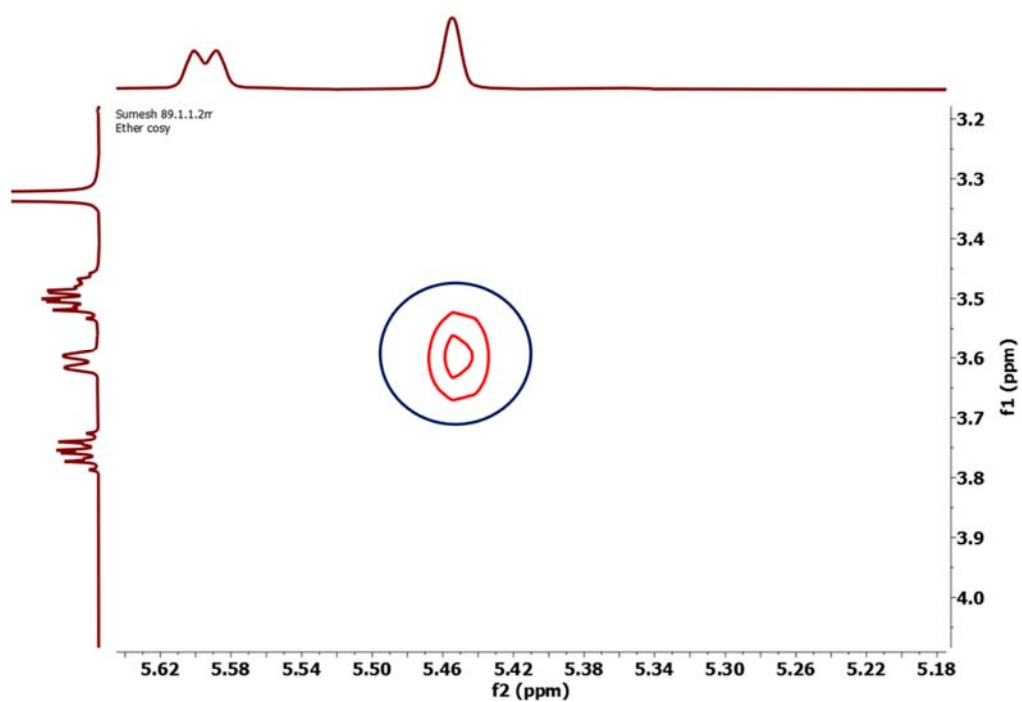

**Figure S8.** Expanded region of Figure S7 showing the correlation between vinyl H at C<sub>7</sub> and the H at C<sub>6</sub>.

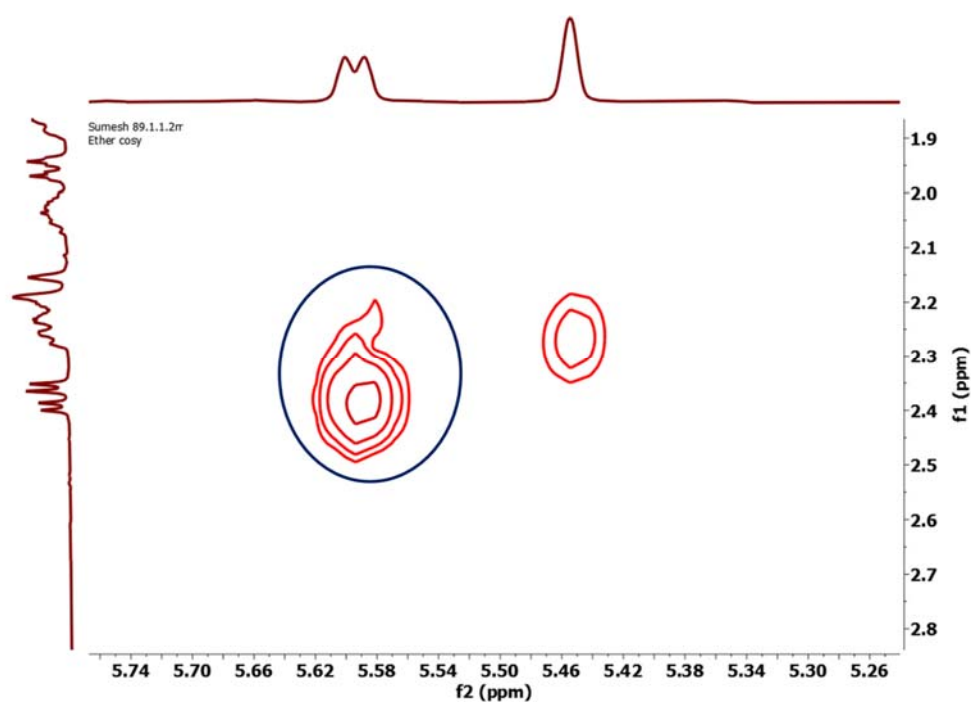

**Figure S9.** Expanded region of Figure S7 showing the correlation between the vinyl H at C<sub>11</sub> and the H-6 proton.

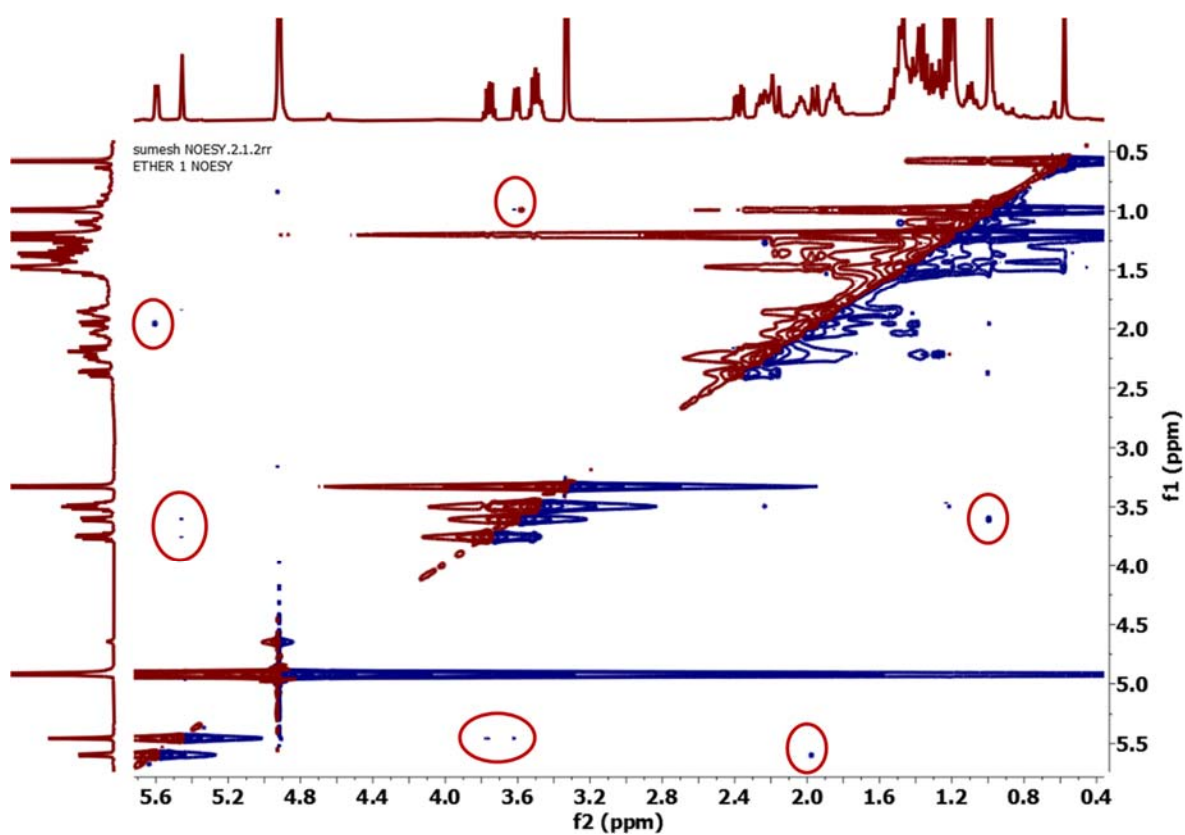

**Figure S10.** NOESY  $^1\text{H}$  NMR spectrum of HOE<sub>1</sub> in CD<sub>3</sub>OD.

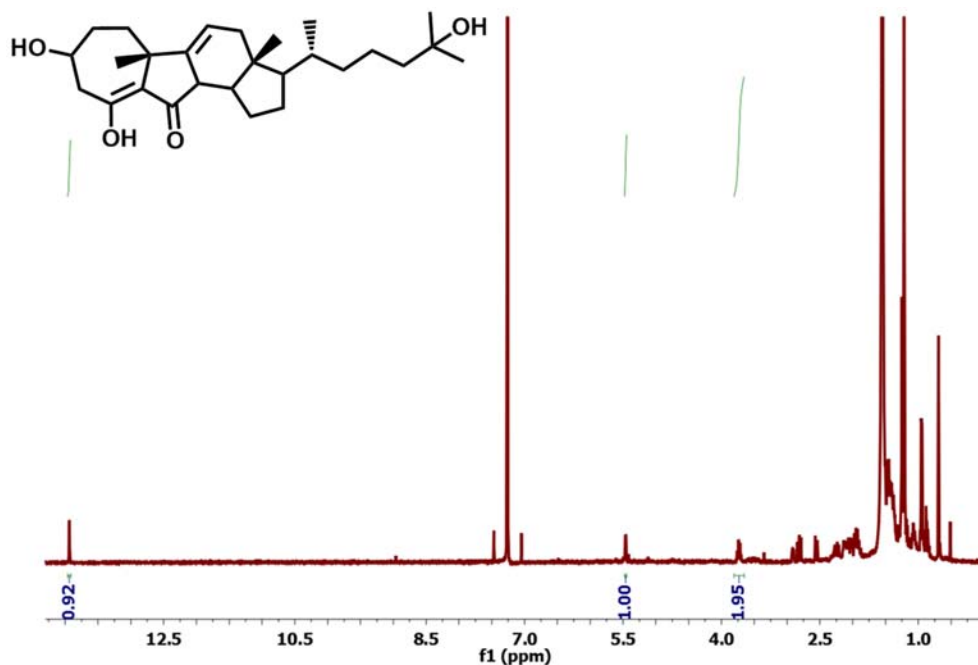

**Figure S11.**  $^1\text{H}$  NMR spectrum of HORP<sub>2</sub> in CD<sub>3</sub>Cl.

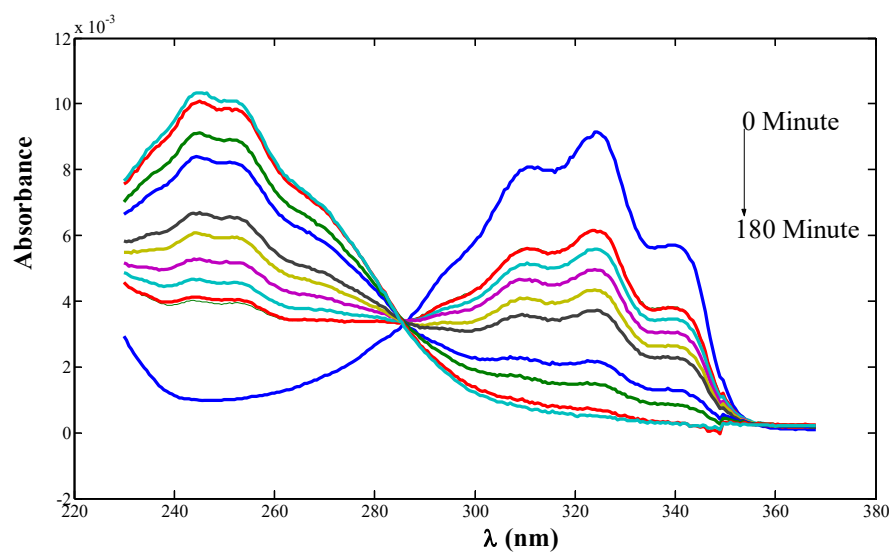

**Figure S12.** Time evolution of UV spectra from the 313 nm irradiation of CTL in ethanol. PCA of the spectral matrix in Figure S12 revealed a two component system. The combination coefficient plot, Figure S13, shows that the spectral points strictly adhere to the normalization line.

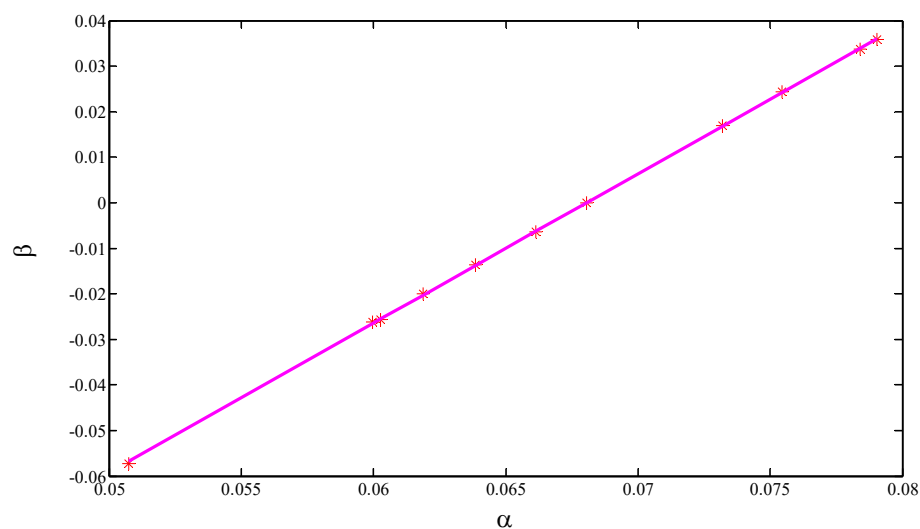

**Figure S13.** Combination coefficient plot for the spectra in Figure S12.

## Crystal Structures

### Structural Information

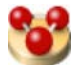

ConDiene123.mol

### HOD<sub>1</sub> Structure

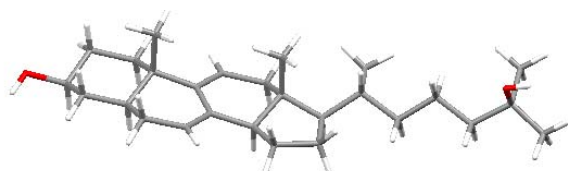

**Table S1** Crystal data and structure refinement

|                   |                                                       |
|-------------------|-------------------------------------------------------|
| Crystal name      | HOD <sub>1</sub>                                      |
| Empirical formula | C <sub>27</sub> H <sub>44</sub> O <sub>2</sub>        |
| Formula weight    | 400.62                                                |
| Temperature/K     | 150.00(11)                                            |
| Crystal system    | orthorhombic                                          |
| Space group       | <i>P</i> 2 <sub>1</sub> 2 <sub>1</sub> 2 <sub>1</sub> |
| <i>a</i> /Å       | 7.1933(2)                                             |
| <i>b</i> /Å       | 9.6267(2)                                             |
| <i>c</i> /Å       | 34.9761(9)                                            |



|                                                |                                                               |
|------------------------------------------------|---------------------------------------------------------------|
| $\alpha/^\circ$                                | 90                                                            |
| $\beta/^\circ$                                 | 90                                                            |
| $\gamma/^\circ$                                | 90                                                            |
| Volume/ $\text{\AA}^3$                         | 2422.02(10)                                                   |
| <i>Z</i>                                       | 4                                                             |
| $\rho_{\text{calc}}/\text{g}/\text{cm}^3$      | 1.099                                                         |
| $\mu/\text{mm}^{-1}$                           | 0.506                                                         |
| <i>F</i> (000)                                 | 888.0                                                         |
| Crystal size/ $\text{mm}^3$                    | $0.332 \times 0.242 \times 0.068$                             |
| Radiation                                      | Cu K $\alpha$ ( $\lambda = 1.54184$ )                         |
| $2\theta$ range for data collection/ $^\circ$  | 5.054 to 155.784                                              |
| Index ranges                                   | $-9 \leq h \leq 9, -9 \leq k \leq 12, -44 \leq l \leq 43$     |
| Reflections collected                          | 18127                                                         |
| Independent reflections                        | 4953 [ $R_{\text{int}} = 0.1169, R_{\text{sigma}} = 0.0732$ ] |
| Data/restraints/parameters                     | 4953/0/270                                                    |
| Goodness-of-fit on $F^2$                       | 1.061                                                         |
| Final <i>R</i> indexes [ $I \geq 2\sigma(I)$ ] | $R_I = 0.0972, wR_2 = 0.2568$                                 |
| Final <i>R</i> indexes [all data]              | $R_I = 0.1073, wR_2 = 0.2643$                                 |
| Largest diff. peak/hole / $\text{e \AA}^{-3}$  | 0.34/-0.32                                                    |
| Flack parameter                                | 0.2(4)                                                        |

**Table S2** Fractional Atomic Coordinates ( $\times 10^4$ ) and Equivalent Isotropic Displacement Parameters ( $\text{\AA}^2 \times 10^3$ ) for HOD<sub>1</sub>.  $U_{\text{eq}}$  is defined as 1/3 of the trace of the orthogonalised  $U_{ij}$  tensor.

| Atom | <i>x</i> | <i>y</i> | <i>z</i>   | <i>U</i> (eq) |
|------|----------|----------|------------|---------------|
| C1   | 2043(8)  | 8205(6)  | 824.3(17)  | 36.9(12)      |
| C2   | 3594(9)  | 7205(6)  | 951.5(17)  | 37.2(12)      |
| C3   | 3917(8)  | 7284(6)  | 1379.7(16) | 35.5(12)      |
| C4   | 2156(7)  | 7046(5)  | 1619.9(15) | 29.3(11)      |
| C5   | 617(8)   | 8039(6)  | 1477.9(16) | 35.7(12)      |
| C6   | 290(9)   | 7940(7)  | 1044.5(17) | 39.5(13)      |
| C7   | 1495(10) | 5527(6)  | 1595.6(17) | 39.7(13)      |
| C8   | 5518(8)  | 6400(7)  | 1506.4(18) | 41.8(14)      |
| C9   | 5825(8)  | 6454(6)  | 1923.0(18) | 38.8(13)      |
| C10  | 4497(7)  | 6912(5)  | 2172.5(15) | 28.6(11)      |
| C11  | 2647(8)  | 7305(5)  | 2045.6(16) | 30.2(11)      |

| <b>Atom</b> | <b>x</b> | <b>y</b> | <b>z</b>   | <b>U(eq)</b> |
|-------------|----------|----------|------------|--------------|
| C12         | 1371(9)  | 7709(6)  | 2303.6(16) | 37.7(13)     |
| C13         | 1702(8)  | 7790(6)  | 2729.0(16) | 33.8(12)     |
| C14         | 3265(7)  | 6812(5)  | 2852.2(14) | 25.0(10)     |
| C15         | 4913(8)  | 7127(6)  | 2589.3(16) | 33.9(12)     |
| C16         | 2615(9)  | 5295(5)  | 2815.2(17) | 34.0(12)     |
| C17         | 6557(8)  | 6407(7)  | 2770.4(17) | 41.6(14)     |
| C18         | 6196(9)  | 6550(7)  | 3202.9(19) | 43.8(15)     |
| C19         | 4192(8)  | 7062(5)  | 3247.9(16) | 30.7(11)     |
| C20         | 3205(8)  | 6463(6)  | 3607.8(15) | 33.1(12)     |
| C21         | 1252(9)  | 6999(8)  | 3659.3(19) | 48.0(15)     |
| C22         | 4364(10) | 6739(6)  | 3969.9(16) | 40.0(14)     |
| C23         | 3813(12) | 5826(6)  | 4310.2(16) | 45.4(16)     |
| C24         | 4949(16) | 6123(6)  | 4658.5(17) | 63(3)        |
| C25         | 4500(20) | 5246(7)  | 5017.6(19) | 84(4)        |
| C26         | 5660(40) | 5714(12) | 5342(2)    | 198(13)      |
| C27         | 2430(20) | 5263(13) | 5105(4)    | 146(9)       |
| O1          | 1677(7)  | 8099(5)  | 425.0(12)  | 44.6(11)     |
| O2          | 5018(8)  | 3842(4)  | 4924.3(12) | 44.4(11)     |

**Table S3** Anisotropic Displacement Parameters ( $\text{\AA}^2 \times 10^3$ ) for HOD<sub>1</sub>. The Anisotropic displacement factor exponent takes the form:  $-2\pi^2[h^2a^{*2}U_{11}+2hka^*b^*U_{12}+\dots]$ .

| <b>Atom</b> | <b>U<sub>11</sub></b> | <b>U<sub>22</sub></b> | <b>U<sub>33</sub></b> | <b>U<sub>23</sub></b> | <b>U<sub>13</sub></b> | <b>U<sub>12</sub></b> |
|-------------|-----------------------|-----------------------|-----------------------|-----------------------|-----------------------|-----------------------|
| C1          | 26(3)                 | 37(3)                 | 48(3)                 | -3(2)                 | -2(2)                 | -5(2)                 |
| C2          | 28(3)                 | 36(3)                 | 47(3)                 | -1(2)                 | 5(2)                  | -1(2)                 |
| C3          | 27(3)                 | 34(3)                 | 46(3)                 | -3(2)                 | 5(2)                  | 5(2)                  |
| C4          | 22(2)                 | 22(2)                 | 43(3)                 | -1(2)                 | -1(2)                 | 0(2)                  |
| C5          | 22(2)                 | 39(3)                 | 46(3)                 | -3(2)                 | -4(2)                 | 5(2)                  |
| C6          | 31(3)                 | 40(3)                 | 48(3)                 | -3(2)                 | -4(2)                 | 5(2)                  |
| C7          | 34(3)                 | 32(3)                 | 53(3)                 | -5(2)                 | -2(3)                 | -11(3)                |
| C8          | 16(3)                 | 52(4)                 | 58(3)                 | 3(3)                  | 6(2)                  | 8(2)                  |
| C9          | 18(2)                 | 41(3)                 | 58(3)                 | 2(3)                  | 4(2)                  | 9(2)                  |
| C10         | 16(2)                 | 22(2)                 | 48(3)                 | 2.8(19)               | 4(2)                  | 1.0(18)               |
| C11         | 22(2)                 | 27(2)                 | 42(3)                 | -4(2)                 | 0(2)                  | 1(2)                  |

| <b>Atom</b> | <b>U<sub>11</sub></b> | <b>U<sub>22</sub></b> | <b>U<sub>33</sub></b> | <b>U<sub>23</sub></b> | <b>U<sub>13</sub></b> | <b>U<sub>12</sub></b> |
|-------------|-----------------------|-----------------------|-----------------------|-----------------------|-----------------------|-----------------------|
| C12         | 31(3)                 | 36(3)                 | 46(3)                 | -1(2)                 | -4(2)                 | 13(2)                 |
| C13         | 22(3)                 | 29(3)                 | 51(3)                 | -6(2)                 | -2(2)                 | 8(2)                  |
| C14         | 19(2)                 | 16(2)                 | 40(3)                 | 1.0(17)               | 4(2)                  | -6.6(18)              |
| C15         | 16(2)                 | 33(3)                 | 52(3)                 | 8(2)                  | 3(2)                  | -1(2)                 |
| C16         | 34(3)                 | 21(2)                 | 47(3)                 | 0(2)                  | 3(2)                  | -8(2)                 |
| C17         | 16(2)                 | 56(4)                 | 53(3)                 | 10(3)                 | -3(2)                 | 2(3)                  |
| C18         | 26(3)                 | 48(4)                 | 57(4)                 | 15(3)                 | -6(3)                 | -5(3)                 |
| C19         | 23(2)                 | 20(2)                 | 49(3)                 | 3(2)                  | -2(2)                 | -3.9(19)              |
| C20         | 30(3)                 | 26(2)                 | 42(3)                 | 0(2)                  | 2(2)                  | -4(2)                 |
| C21         | 32(3)                 | 60(4)                 | 52(3)                 | -3(3)                 | 4(3)                  | 9(3)                  |
| C22         | 44(3)                 | 32(3)                 | 44(3)                 | 5(2)                  | 0(3)                  | -5(3)                 |
| C23         | 62(5)                 | 30(3)                 | 44(3)                 | 8(2)                  | 4(3)                  | -1(3)                 |
| C24         | 123(8)                | 27(3)                 | 41(3)                 | 8(2)                  | -2(4)                 | -12(4)                |
| C25         | 183(13)               | 30(3)                 | 38(3)                 | 7(3)                  | 14(5)                 | 18(5)                 |
| C26         | 480(40)               | 73(7)                 | 38(4)                 | 14(4)                 | -58(11)               | -72(14)               |
| C27         | 240(20)               | 91(8)                 | 111(8)                | 63(7)                 | 114(12)               | 106(11)               |
| O1          | 49(3)                 | 42(2)                 | 43(2)                 | 1.2(18)               | -3(2)                 | -2(2)                 |
| O2          | 57(3)                 | 29(2)                 | 47(2)                 | 7.8(16)               | 4(2)                  | -0.1(19)              |

**Table S4** Bond Lengths for HOD<sub>1</sub>.

| <b>Atom</b> | <b>Atom</b> | <b>Length/Å</b> | <b>Atom</b> | <b>Atom</b> | <b>Length/Å</b> |
|-------------|-------------|-----------------|-------------|-------------|-----------------|
| C1          | C2          | 1.539(8)        | C13         | C14         | 1.528(7)        |
| C1          | C6          | 1.499(8)        | C14         | C15         | 1.531(7)        |
| C1          | O1          | 1.425(7)        | C14         | C16         | 1.539(6)        |
| C2          | C3          | 1.517(8)        | C14         | C19         | 1.555(7)        |
| C3          | C4          | 1.537(7)        | C15         | C17         | 1.510(8)        |
| C3          | C8          | 1.499(8)        | C17         | C18         | 1.541(9)        |
| C4          | C5          | 1.545(7)        | C18         | C19         | 1.532(8)        |
| C4          | C7          | 1.540(7)        | C19         | C20         | 1.556(8)        |
| C4          | C11         | 1.550(8)        | C20         | C21         | 1.507(9)        |
| C5          | C6          | 1.537(8)        | C20         | C22         | 1.539(8)        |
| C8          | C9          | 1.475(9)        | C22         | C23         | 1.532(8)        |

| Atom Atom Length/Å |     |          | Atom Atom Length/Å |     |           |
|--------------------|-----|----------|--------------------|-----|-----------|
| C9                 | C10 | 1.366(8) | C23                | C24 | 1.494(10) |
| C10                | C11 | 1.454(7) | C24                | C25 | 1.547(9)  |
| C10                | C15 | 1.503(8) | C25                | C26 | 1.481(18) |
| C11                | C12 | 1.345(8) | C25                | C27 | 1.52(2)   |
| C12                | C13 | 1.509(8) | C25                | O2  | 1.439(9)  |

**Table S5** Bond Angles for HOD<sub>1</sub>.

| Atom Atom Atom Angle/° |     |     |          | Atom Atom Atom Angle/° |     |     |           |
|------------------------|-----|-----|----------|------------------------|-----|-----|-----------|
| C6                     | C1  | C2  | 110.8(5) | C13                    | C14 | C16 | 109.7(5)  |
| O1                     | C1  | C2  | 111.9(5) | C13                    | C14 | C19 | 118.1(4)  |
| O1                     | C1  | C6  | 109.6(5) | C15                    | C14 | C16 | 111.9(4)  |
| C3                     | C2  | C1  | 111.4(5) | C15                    | C14 | C19 | 99.9(4)   |
| C2                     | C3  | C4  | 113.9(5) | C16                    | C14 | C19 | 110.6(4)  |
| C8                     | C3  | C2  | 112.4(5) | C10                    | C15 | C14 | 113.7(4)  |
| C8                     | C3  | C4  | 112.8(5) | C10                    | C15 | C17 | 120.0(5)  |
| C3                     | C4  | C5  | 108.8(4) | C17                    | C15 | C14 | 105.3(4)  |
| C3                     | C4  | C7  | 111.5(5) | C15                    | C17 | C18 | 103.8(5)  |
| C3                     | C4  | C11 | 108.3(5) | C19                    | C18 | C17 | 106.7(5)  |
| C5                     | C4  | C11 | 111.8(4) | C14                    | C19 | C20 | 117.8(4)  |
| C7                     | C4  | C5  | 110.4(5) | C18                    | C19 | C14 | 105.2(5)  |
| C7                     | C4  | C11 | 106.0(4) | C18                    | C19 | C20 | 113.1(5)  |
| C6                     | C5  | C4  | 112.9(5) | C21                    | C20 | C19 | 113.3(5)  |
| C1                     | C6  | C5  | 111.6(5) | C21                    | C20 | C22 | 110.3(5)  |
| C9                     | C8  | C3  | 112.8(5) | C22                    | C20 | C19 | 110.8(5)  |
| C10                    | C9  | C8  | 122.5(5) | C23                    | C22 | C20 | 113.6(5)  |
| C9                     | C10 | C11 | 121.9(5) | C24                    | C23 | C22 | 112.5(6)  |
| C9                     | C10 | C15 | 121.7(5) | C23                    | C24 | C25 | 116.3(8)  |
| C11                    | C10 | C15 | 116.3(4) | C26                    | C25 | C24 | 109.7(10) |
| C10                    | C11 | C4  | 117.4(5) | C26                    | C25 | C27 | 113.4(12) |
| C12                    | C11 | C4  | 122.4(5) | C27                    | C25 | C24 | 111.2(9)  |
| C12                    | C11 | C10 | 119.7(5) | O2                     | C25 | C24 | 105.9(6)  |
| C11                    | C12 | C13 | 124.7(5) | O2                     | C25 | C26 | 108.2(10) |

**Atom Atom Atom Angle/°**

C12 C13 C14 111.2(4)

C13 C14 C15 106.2(4)

**Atom Atom Atom Angle/°**

O2 C25 C27 108.1(9)

**Table S6** Torsion Angles for HOD<sub>1</sub>.

| <b>A</b> | <b>B</b> | <b>C</b> | <b>D</b> | <b>Angle/°</b> | <b>A</b> | <b>B</b> | <b>C</b> | <b>D</b> | <b>Angle/°</b> |
|----------|----------|----------|----------|----------------|----------|----------|----------|----------|----------------|
| C1       | C2       | C3       | C4       | 54.5(6)        | C12      | C13      | C14      | C15      | 51.2(6)        |
| C1       | C2       | C3       | C8       | -175.7(5)      | C12      | C13      | C14      | C16      | -69.8(6)       |
| C2       | C1       | C6       | C5       | 55.9(7)        | C12      | C13      | C14      | C19      | 162.2(5)       |
| C2       | C3       | C4       | C5       | -52.5(6)       | C13      | C14      | C15      | C10      | -59.5(5)       |
| C2       | C3       | C4       | C7       | 69.5(6)        | C13      | C14      | C15      | C17      | 167.2(5)       |
| C2       | C3       | C4       | C11      | -174.2(4)      | C13      | C14      | C19      | C18      | -150.1(5)      |
| C2       | C3       | C8       | C9       | -179.2(5)      | C13      | C14      | C19      | C20      | 82.7(6)        |
| C3       | C4       | C5       | C6       | 52.7(6)        | C14      | C15      | C17      | C18      | -35.1(6)       |
| C3       | C4       | C11      | C10      | -34.7(6)       | C14      | C19      | C20      | C21      | -58.5(6)       |
| C3       | C4       | C11      | C12      | 153.6(5)       | C14      | C19      | C20      | C22      | 177.0(5)       |
| C3       | C8       | C9       | C10      | 18.0(9)        | C15      | C10      | C11      | C4       | -177.9(5)      |
| C4       | C3       | C8       | C9       | -48.7(7)       | C15      | C10      | C11      | C12      | -6.0(7)        |
| C4       | C5       | C6       | C1       | -56.3(7)       | C15      | C14      | C19      | C18      | -35.7(5)       |
| C4       | C11      | C12      | C13      | 171.3(5)       | C15      | C14      | C19      | C20      | -162.9(4)      |
| C5       | C4       | C11      | C10      | -154.6(5)      | C15      | C17      | C18      | C19      | 11.6(6)        |
| C5       | C4       | C11      | C12      | 33.7(7)        | C16      | C14      | C15      | C10      | 60.2(6)        |
| C6       | C1       | C2       | C3       | -55.0(6)       | C16      | C14      | C15      | C17      | -73.1(6)       |
| C7       | C4       | C5       | C6       | -70.0(6)       | C16      | C14      | C19      | C18      | 82.3(5)        |
| C7       | C4       | C11      | C10      | 85.0(6)        | C16      | C14      | C19      | C20      | -44.9(6)       |
| C7       | C4       | C11      | C12      | -86.7(6)       | C17      | C18      | C19      | C14      | 15.5(6)        |
| C8       | C3       | C4       | C5       | 177.9(5)       | C17      | C18      | C19      | C20      | 145.4(5)       |
| C8       | C3       | C4       | C7       | -60.2(7)       | C18      | C19      | C20      | C21      | 178.3(5)       |
| C8       | C3       | C4       | C11      | 56.1(6)        | C18      | C19      | C20      | C22      | 53.7(6)        |
| C8       | C9       | C10      | C11      | 3.5(9)         | C19      | C14      | C15      | C10      | 177.3(4)       |
| C8       | C9       | C10      | C15      | -172.3(5)      | C19      | C14      | C15      | C17      | 44.0(5)        |
| C9       | C10      | C11      | C4       | 6.1(7)         | C19      | C20      | C22      | C23      | -162.5(5)      |
| C9       | C10      | C11      | C12      | 178.0(6)       | C20      | C22      | C23      | C24      | -179.5(6)      |

| A   | B   | C   | D   | Angle/°   | A   | B   | C   | D   | Angle/°    |
|-----|-----|-----|-----|-----------|-----|-----|-----|-----|------------|
| C9  | C10 | C15 | C14 | -146.5(5) | C21 | C20 | C22 | C23 | 71.2(7)    |
| C9  | C10 | C15 | C17 | -20.7(8)  | C22 | C23 | C24 | C25 | -179.8(7)  |
| C10 | C11 | C12 | C13 | -0.1(9)   | C23 | C24 | C25 | C26 | -176.9(12) |
| C10 | C15 | C17 | C18 | -164.8(5) | C23 | C24 | C25 | C27 | -50.7(11)  |
| C11 | C4  | C5  | C6  | 172.2(5)  | C23 | C24 | C25 | O2  | 66.5(12)   |
| C11 | C10 | C15 | C14 | 37.4(6)   | O1  | C1  | C2  | C3  | -177.6(5)  |
| C11 | C10 | C15 | C17 | 163.3(5)  | O1  | C1  | C6  | C5  | 179.8(5)   |
| C11 | C12 | C13 | C14 | -24.5(8)  |     |     |     |     |            |

**Table S7** Hydrogen Atom Coordinates ( $\text{\AA} \times 10^4$ ) and Isotropic Displacement Parameters ( $\text{\AA}^2 \times 10^3$ ) for HOD<sub>1</sub>.

| Atom | x       | y       | z       | U(eq) |
|------|---------|---------|---------|-------|
| H1   | 2459.65 | 9175.25 | 879.42  | 44    |
| H2A  | 3249.05 | 6243.32 | 880.94  | 45    |
| H2B  | 4759.58 | 7442.65 | 816     | 45    |
| H3   | 4302.19 | 8263.98 | 1431.79 | 43    |
| H5A  | -556.7  | 7818.53 | 1612.66 | 43    |
| H5B  | 964.3   | 9004.74 | 1543.68 | 43    |
| H6A  | -186.29 | 7003.25 | 980.92  | 47    |
| H6B  | -663.43 | 8627.5  | 968.11  | 47    |
| H7A  | 2365.26 | 4928.98 | 1734.74 | 60    |
| H7B  | 1444.57 | 5238.98 | 1327.04 | 60    |
| H7C  | 254.99  | 5447.27 | 1709.41 | 60    |
| H8A  | 5280.98 | 5425.62 | 1429.9  | 50    |
| H8B  | 6659.78 | 6713.86 | 1374.24 | 50    |
| H9   | 6990.16 | 6159.17 | 2021.68 | 47    |
| H12  | 175.35  | 7962    | 2211.5  | 45    |
| H13A | 545.08  | 7539.73 | 2865.94 | 41    |
| H13B | 2031.33 | 8755.18 | 2799.52 | 41    |
| H15  | 5157.62 | 8143.79 | 2618.47 | 41    |
| H16A | 3585.27 | 4674.25 | 2912.76 | 51    |
| H16B | 2374.18 | 5081.83 | 2545.7  | 51    |
| H16C | 1472.99 | 5162.58 | 2963.45 | 51    |

| Atom | x       | Y       | z       | U(eq) |
|------|---------|---------|---------|-------|
| H17A | 7736.27 | 6866.14 | 2697.38 | 50    |
| H17B | 6611.02 | 5418.27 | 2693.68 | 50    |
| H18A | 6356.73 | 5641.58 | 3331.65 | 53    |
| H18B | 7074.03 | 7222.67 | 3317.61 | 53    |
| H19  | 4258.99 | 8091.55 | 3284.09 | 37    |
| H20  | 3124.39 | 5433.35 | 3574.24 | 40    |
| H21A | 1265.54 | 8016.68 | 3660.09 | 72    |
| H21B | 750.91  | 6660.66 | 3902.69 | 72    |
| H21C | 470.76  | 6667.08 | 3448.78 | 72    |
| H22A | 5691.99 | 6578.71 | 3910.52 | 48    |
| H22B | 4221.16 | 7726.59 | 4043.3  | 48    |
| H23A | 2483.85 | 5980.35 | 4369.83 | 54    |
| H23B | 3968.4  | 4837.26 | 4238.96 | 54    |
| H24A | 4790.1  | 7115.36 | 4724.81 | 76    |
| H24B | 6274.37 | 5980.27 | 4593.47 | 76    |
| H26A | 5554.56 | 5049.74 | 5553.19 | 297   |
| H26B | 5243.65 | 6631.2  | 5427.5  | 297   |
| H26C | 6964.55 | 5770.78 | 5260.15 | 297   |
| H27A | 1735.11 | 4928.73 | 4881.67 | 220   |
| H27B | 2037.1  | 6214.12 | 5165.09 | 220   |
| H27C | 2171.61 | 4658.61 | 5324.12 | 220   |
| H1A  | 2649.73 | 8279.78 | 301.86  | 67    |
| H2   | 5227.29 | 3398.03 | 5126.54 | 67    |

#### HOD<sub>2</sub> Structure

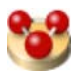

UnconjDiene.mol

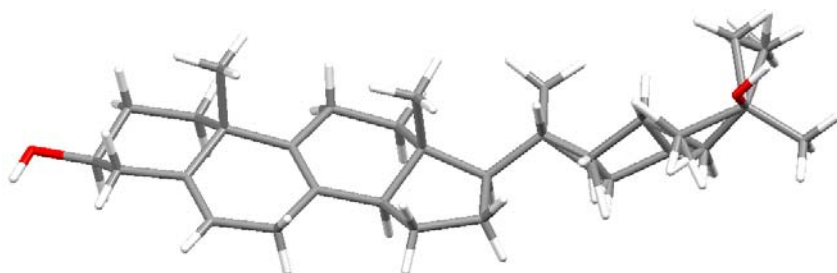

**Table S8** Crystal data and structure refinement

|                                                              |                                                                              |
|--------------------------------------------------------------|------------------------------------------------------------------------------|
| Crystal name                                                 | HOD <sub>2</sub>                                                             |
| Molecular Formula                                            | C <sub>27</sub> H <sub>44</sub> O <sub>2</sub>                               |
| Formula Weight                                               | 400.62                                                                       |
| Temperature/K                                                | 149.98(10)                                                                   |
| Crystal System                                               | Orthorhombic                                                                 |
| Space Group                                                  | <i>P</i> 212121                                                              |
| <i>a</i> [Å]                                                 | 7.33440(10)                                                                  |
| <i>b</i> [Å]                                                 | 9.6312(2)                                                                    |
| <i>c</i> [Å]                                                 | 34.4304(9)                                                                   |
| [°]                                                          | 90                                                                           |
| [°]                                                          | 90                                                                           |
| [°]                                                          | 90                                                                           |
| <i>V</i> [Å <sup>3</sup> ]                                   | 2432.13(9)                                                                   |
| <i>Z</i>                                                     | 4                                                                            |
| $\rho_{\text{calc}}$ /cm <sup>3</sup>                        | 1.094                                                                        |
| $\mu$ /mm <sup>-1</sup>                                      | 0.504                                                                        |
| <i>F</i> (000)                                               | 888.0                                                                        |
| Crystal size/mm <sup>3</sup>                                 | 0.13 × 0.1 × 0.04                                                            |
| Radiation                                                    | Cu K $\alpha$ ( $\lambda$ = 1.54184)                                         |
| 2 $\theta$ range for data collection/°                       | 5.134 to 155.072                                                             |
| Index ranges                                                 | -9 ≤ <i>h</i> ≤ 9, -8 ≤ <i>k</i> ≤ 12, -43 ≤ <i>l</i> ≤ 43                   |
| Reflections collected                                        | 24631                                                                        |
| Independent reflections                                      | 5079 [ <i>R</i> <sub>int</sub> = 0.0329, <i>R</i> <sub>sigma</sub> = 0.0205] |
| Data/restraints/parameters                                   | 5079/0/321                                                                   |
| Goodness-of-fit on <i>F</i> <sup>2</sup>                     | 1.198                                                                        |
| Final <i>R</i> indexes [ <i>I</i> > 2 $\sigma$ ( <i>I</i> )] | <i>R</i> <sub>I</sub> = 0.0796, <i>wR</i> <sub>2</sub> = 0.1851              |
| Final <i>R</i> indexes [all data]                            | <i>R</i> <sub>I</sub> = 0.0847, <i>wR</i> <sub>2</sub> = 0.1877              |
| Largest diff. peak/hole / e Å <sup>-3</sup>                  | 0.23/-0.22                                                                   |
| Flack parameter                                              | 0.11(2)                                                                      |



**Table S9** Fractional Atomic Coordinates ( $\times 10^4$ ) and Equivalent Isotropic Displacement Parameters ( $\text{\AA}^2 \times 10^3$ ) for HOD<sub>2</sub>.  $U_{\text{eq}}$  is defined as 1/3 of the trace of the orthogonalised  $U_{ij}$  tensor.

| <b>Atom</b> | <b>X</b> | <b>y</b> | <b>z</b>   | <b>U(eq)</b> |
|-------------|----------|----------|------------|--------------|
| C1          | 2710(7)  | 8334(6)  | 847.7(17)  | 53.9(14)     |
| C2          | 905(7)   | 8232(6)  | 1061.1(17) | 52.3(14)     |
| C3          | 1175(6)  | 8328(5)  | 1497.3(17) | 47.4(13)     |
| C4          | 2500(6)  | 7222(5)  | 1668.9(17) | 44.0(12)     |
| C005        | 4866(6)  | 7564(5)  | 2680.0(17) | 43.9(12)     |
| C5          | 4230(6)  | 7202(5)  | 1425.8(17) | 47.6(13)     |
| C6          | 3990(7)  | 7191(6)  | 992.9(17)  | 55.8(15)     |
| C7          | 1602(7)  | 5763(5)  | 1641.1(19) | 54.2(15)     |
| C8          | 5879(6)  | 7132(5)  | 1583.4(16) | 45.1(12)     |
| C9          | 6211(6)  | 7070(5)  | 2005.1(17) | 47.4(14)     |
| C10         | 4558(6)  | 7379(5)  | 2252.9(17) | 40.2(12)     |
| C11         | 2891(6)  | 7510(5)  | 2098.2(16) | 39.2(11)     |
| C12         | 1254(6)  | 7843(5)  | 2349.7(16) | 44.8(12)     |
| C13         | 1655(6)  | 8137(5)  | 2778.8(16) | 41.4(12)     |
| C14         | 3196(6)  | 7217(5)  | 2933.2(17) | 43.0(12)     |
| C15         | 2681(7)  | 5675(5)  | 2890(2)    | 62.3(18)     |
| C16         | 6425(6)  | 6802(6)  | 2883.2(18) | 55.1(15)     |
| C17         | 5956(7)  | 6953(6)  | 3317.4(17) | 55.5(15)     |
| C18         | 3947(6)  | 7517(5)  | 3340.2(17) | 49.0(13)     |
| C19         | 2951(7)  | 6935(7)  | 3697(2)    | 73(2)        |
| C20         | 922(7)   | 7362(7)  | 3708(2)    | 70.0(19)     |
| C21         | 3936(13) | 7691(12) | 4122(3)    | 51(2)        |
| C22         | 3412(15) | 7114(10) | 4513(2)    | 41(2)        |
| C23         | 4110(20) | 6194(14) | 4725(4)    | 54(3)        |
| C24         | 3526(8)  | 5055(8)  | 4989(2)    | 75(2)        |
| C25         | 4291(14) | 5622(9)  | 5359(2)    | 103(3)       |
| C26         | 1457(19) | 5129(16) | 5111(4)    | 58(3)        |
| C27         | 3777(17) | 6928(12) | 4001(3)    | 29(2)        |
| C28         | 3184(15) | 5986(11) | 4341(3)    | 42(2)        |
| C29         | 4110(16) | 5636(13) | 4565(3)    | 39(2)        |
| C30         | 1423(17) | 4674(15) | 4919(4)    | 52(3)        |

| Atom | X       | y       | z          | U(eq)    |
|------|---------|---------|------------|----------|
| O1   | 2401(5) | 8234(5) | 440.2(12)  | 62.0(11) |
| O2   | 4291(5) | 3702(5) | 4930.2(12) | 60.0(11) |

**Table S10** Anisotropic Displacement Parameters ( $\text{\AA}^2 \times 10^3$ ) for HOD<sub>2</sub>. The Anisotropic displacement factor exponent takes the form:  $-2\pi^2[h^2a^{*2}U_{11}+2hka^*b^*U_{12}+\dots]$ .

| Atom | U <sub>11</sub> | U <sub>22</sub> | U <sub>33</sub> | U <sub>23</sub> | U <sub>13</sub> | U <sub>12</sub> |
|------|-----------------|-----------------|-----------------|-----------------|-----------------|-----------------|
| C1   | 31(2)           | 59(3)           | 72(4)           | -19(3)          | 1(2)            | -4(2)           |
| C2   | 29(2)           | 52(3)           | 77(4)           | -7(3)           | -2(3)           | 3(2)            |
| C3   | 24(2)           | 39(3)           | 78(4)           | -8(2)           | 3(2)            | 2(2)            |
| C4   | 21.4(19)        | 33(2)           | 77(4)           | -7(2)           | 1(2)            | 0.6(18)         |
| C005 | 17.7(18)        | 33(2)           | 81(4)           | 13(2)           | -1(2)           | -0.5(18)        |
| C5   | 26(2)           | 37(3)           | 80(4)           | -19(3)          | 3(2)            | 1(2)            |
| C6   | 29(2)           | 58(3)           | 80(4)           | -24(3)          | 0(3)            | 2(2)            |
| C7   | 41(3)           | 39(3)           | 83(4)           | -14(3)          | -3(3)           | -9(2)           |
| C8   | 24(2)           | 42(3)           | 69(4)           | -10(2)          | 4(2)            | 1(2)            |
| C9   | 19(2)           | 29(2)           | 94(4)           | 1(2)            | 5(2)            | 3.1(18)         |
| C10  | 20(2)           | 27(2)           | 73(3)           | 2(2)            | 4(2)            | 0.8(17)         |
| C11  | 22.5(19)        | 29(2)           | 66(3)           | -6(2)           | 2(2)            | -1.4(17)        |
| C12  | 21(2)           | 43(3)           | 71(4)           | -11(2)          | 1(2)            | 4(2)            |
| C13  | 22(2)           | 32(2)           | 70(3)           | -1(2)           | 3(2)            | 3.3(17)         |
| C14  | 22(2)           | 27(2)           | 80(4)           | 10(2)           | 7(2)            | 0.9(17)         |
| C15  | 33(3)           | 31(2)           | 124(6)          | 8(3)            | 17(3)           | -1(2)           |
| C16  | 22(2)           | 57(3)           | 87(4)           | 24(3)           | 0(2)            | 5(2)            |
| C17  | 28(2)           | 61(3)           | 78(4)           | 38(3)           | 5(3)            | 6(2)            |
| C18  | 27(2)           | 43(3)           | 78(4)           | 25(3)           | 5(2)            | 6(2)            |
| C19  | 34(3)           | 81(5)           | 105(6)          | 52(4)           | 24(3)           | 20(3)           |
| C20  | 38(3)           | 86(5)           | 86(4)           | 34(4)           | 17(3)           | 20(3)           |
| C21  | 44(5)           | 69(7)           | 38(5)           | -6(5)           | -5(4)           | 5(5)            |
| C22  | 64(6)           | 42(5)           | 16(4)           | -5(4)           | 3(4)            | 8(5)            |
| C23  | 62(8)           | 56(8)           | 43(7)           | -3(6)           | -14(7)          | -13(7)          |
| C24  | 44(3)           | 78(5)           | 102(6)          | 44(4)           | 5(4)            | 9(3)            |
| C25  | 136(8)          | 78(5)           | 96(6)           | 7(5)            | 17(6)           | -16(6)          |
| C26  | 53(7)           | 63(9)           | 58(9)           | 10(7)           | 18(7)           | 19(7)           |

| Atom | U <sub>11</sub> | U <sub>22</sub> | U <sub>33</sub> | U <sub>23</sub> | U <sub>13</sub> | U <sub>12</sub> |
|------|-----------------|-----------------|-----------------|-----------------|-----------------|-----------------|
| C27  | 44(6)           | 23(5)           | 22(5)           | 0(4)            | -10(5)          | -3(5)           |
| C28  | 50(6)           | 51(6)           | 23(4)           | -2(4)           | -5(5)           | -6(5)           |
| C29  | 37(5)           | 54(7)           | 26(6)           | 3(5)            | -8(5)           | 4(5)            |
| C30  | 36(6)           | 64(9)           | 56(9)           | -2(6)           | 11(6)           | 14(6)           |
| O1   | 36.3(19)        | 79(3)           | 71(3)           | -24(2)          | 1.5(19)         | -1(2)           |
| O2   | 43(2)           | 77(3)           | 60(3)           | 23(2)           | 8.2(19)         | 0(2)            |

**Table S11** Bond Lengths for HOD<sub>2</sub>.

| Atom | Atom | Length/Å | Atom | Atom | Length/Å  |
|------|------|----------|------|------|-----------|
| C1   | C2   | 1.517(7) | C14  | C15  | 1.540(7)  |
| C1   | C6   | 1.531(8) | C14  | C18  | 1.533(8)  |
| C1   | O1   | 1.425(7) | C16  | C17  | 1.541(8)  |
| C2   | C3   | 1.518(8) | C17  | C18  | 1.572(6)  |
| C3   | C4   | 1.558(7) | C18  | C19  | 1.537(8)  |
| C4   | C5   | 1.520(7) | C19  | C20  | 1.544(7)  |
| C4   | C7   | 1.555(7) | C19  | C21  | 1.785(12) |
| C4   | C11  | 1.531(8) | C19  | C27  | 1.207(12) |
| C005 | C10  | 1.498(8) | C21  | C22  | 1.507(12) |
| C005 | C14  | 1.540(6) | C22  | C23  | 1.256(16) |
| C005 | C16  | 1.528(6) | C23  | C24  | 1.487(14) |
| C5   | C6   | 1.501(8) | C24  | C25  | 1.495(11) |
| C5   | C8   | 1.327(7) | C24  | C26  | 1.577(14) |
| C8   | C9   | 1.473(8) | C24  | C29  | 1.621(12) |
| C9   | C10  | 1.512(6) | C24  | C30  | 1.604(14) |
| C10  | C11  | 1.340(6) | C24  | O2   | 1.433(8)  |
| C11  | C12  | 1.515(6) | C27  | C28  | 1.543(14) |
| C12  | C13  | 1.533(7) | C28  | C29  | 1.083(14) |
| C13  | C14  | 1.531(6) |      |      |           |

**Table S12** Bond Angles for HOD<sub>2</sub>.

| Atom Atom Atom Angle/° |      |      |          | Atom Atom Atom Angle/° |     |      |           |
|------------------------|------|------|----------|------------------------|-----|------|-----------|
| C2                     | C1   | C6   | 109.3(5) | C13                    | C14 | C005 | 105.4(4)  |
| O1                     | C1   | C2   | 109.5(4) | C13                    | C14 | C15  | 110.1(4)  |
| O1                     | C1   | C6   | 111.7(5) | C13                    | C14 | C18  | 118.3(4)  |
| C1                     | C2   | C3   | 111.2(4) | C15                    | C14 | C005 | 110.5(4)  |
| C2                     | C3   | C4   | 114.5(4) | C18                    | C14 | C005 | 101.0(4)  |
| C5                     | C4   | C3   | 108.7(4) | C18                    | C14 | C15  | 111.0(5)  |
| C5                     | C4   | C7   | 107.9(4) | C005                   | C16 | C17  | 103.4(4)  |
| C5                     | C4   | C11  | 112.2(4) | C16                    | C17 | C18  | 106.9(4)  |
| C7                     | C4   | C3   | 109.3(4) | C14                    | C18 | C17  | 103.1(4)  |
| C11                    | C4   | C3   | 111.0(4) | C14                    | C18 | C19  | 119.5(5)  |
| C11                    | C4   | C7   | 107.6(5) | C19                    | C18 | C17  | 111.1(4)  |
| C10                    | C005 | C14  | 114.2(4) | C18                    | C19 | C20  | 112.3(5)  |
| C10                    | C005 | C16  | 120.3(4) | C27                    | C19 | C18  | 117.1(8)  |
| C16                    | C005 | C14  | 103.4(4) | C27                    | C19 | C20  | 117.7(9)  |
| C6                     | C5   | C4   | 116.7(4) | C22                    | C21 | C19  | 118.6(8)  |
| C8                     | C5   | C4   | 122.4(5) | C23                    | C22 | C21  | 132.5(11) |
| C8                     | C5   | C6   | 120.8(5) | C22                    | C23 | C24  | 139.4(13) |
| C5                     | C6   | C1   | 113.0(4) | C23                    | C24 | C26  | 113.9(9)  |
| C5                     | C8   | C9   | 123.7(5) | C25                    | C24 | C29  | 122.8(7)  |
| C8                     | C9   | C10  | 114.6(4) | C25                    | C24 | C30  | 124.9(8)  |
| C005                   | C10  | C9   | 117.2(4) | C30                    | C24 | C29  | 101.4(8)  |
| C11                    | C10  | C005 | 121.1(4) | O2                     | C24 | C25  | 107.8(6)  |
| C11                    | C10  | C9   | 121.7(5) | O2                     | C24 | C29  | 94.8(7)   |
| C10                    | C11  | C4   | 122.5(4) | O2                     | C24 | C30  | 98.5(7)   |
| C10                    | C11  | C12  | 121.1(5) | C19                    | C27 | C28  | 121.2(10) |
| C12                    | C11  | C4   | 116.2(4) | C29                    | C28 | C27  | 123.2(11) |
| C11                    | C12  | C13  | 116.0(4) | C28                    | C29 | C24  | 125.8(11) |
| C14                    | C13  | C12  | 111.7(4) |                        |     |      |           |

**Table S13** Torsion Angles for HOD<sub>2</sub>.

| A    | B   | C   | D    | Angle/°   | A   | B    | C   | D    | Angle/°    |
|------|-----|-----|------|-----------|-----|------|-----|------|------------|
| C1   | C2  | C3  | C4   | -56.6(6)  | C11 | C4   | C5  | C6   | -169.1(4)  |
| C2   | C1  | C6  | C5   | -54.2(6)  | C11 | C4   | C5  | C8   | 14.0(7)    |
| C2   | C3  | C4  | C5   | 48.6(5)   | C11 | C12  | C13 | C14  | -36.6(6)   |
| C2   | C3  | C4  | C7   | -69.0(6)  | C12 | C13  | C14 | C005 | 59.8(5)    |
| C2   | C3  | C4  | C11  | 172.5(4)  | C12 | C13  | C14 | C15  | -59.4(6)   |
| C3   | C4  | C5  | C6   | -45.9(6)  | C12 | C13  | C14 | C18  | 171.6(4)   |
| C3   | C4  | C5  | C8   | 137.2(5)  | C13 | C14  | C18 | C17  | -153.4(4)  |
| C3   | C4  | C11 | C10  | -138.7(5) | C13 | C14  | C18 | C19  | 82.9(6)    |
| C3   | C4  | C11 | C12  | 46.0(5)   | C14 | C005 | C10 | C9   | -153.7(4)  |
| C4   | C5  | C6  | C1   | 51.0(6)   | C14 | C005 | C10 | C11  | 27.6(6)    |
| C4   | C5  | C8  | C9   | -0.2(8)   | C14 | C005 | C16 | C17  | -36.6(6)   |
| C4   | C11 | C12 | C13  | -179.7(4) | C14 | C18  | C19 | C20  | -55.0(8)   |
| C005 | C10 | C11 | C4   | -175.3(4) | C14 | C18  | C19 | C27  | 164.2(8)   |
| C005 | C10 | C11 | C12  | -0.3(7)   | C15 | C14  | C18 | C17  | 78.0(5)    |
| C005 | C14 | C18 | C17  | -39.2(4)  | C15 | C14  | C18 | C19  | -45.7(6)   |
| C005 | C14 | C18 | C19  | -162.8(4) | C16 | C005 | C10 | C9   | -29.8(6)   |
| C005 | C16 | C17 | C18  | 11.7(6)   | C16 | C005 | C10 | C11  | 151.5(5)   |
| C5   | C4  | C11 | C10  | -16.9(6)  | C16 | C005 | C14 | C13  | 171.5(4)   |
| C5   | C4  | C11 | C12  | 167.9(4)  | C16 | C005 | C14 | C15  | -69.7(6)   |
| C5   | C8  | C9  | C10  | -11.6(7)  | C16 | C005 | C14 | C18  | 47.8(5)    |
| C6   | C1  | C2  | C3   | 57.0(6)   | C16 | C17  | C18 | C14  | 17.3(5)    |
| C6   | C5  | C8  | C9   | -177.0(5) | C16 | C17  | C18 | C19  | 146.4(6)   |
| C7   | C4  | C5  | C6   | 72.5(6)   | C17 | C18  | C19 | C20  | -174.7(6)  |
| C7   | C4  | C5  | C8   | -104.4(6) | C17 | C18  | C19 | C27  | 44.5(10)   |
| C7   | C4  | C11 | C10  | 101.7(5)  | C18 | C19  | C27 | C28  | -160.9(8)  |
| C7   | C4  | C11 | C12  | -73.5(5)  | C19 | C21  | C22 | C23  | 92.5(15)   |
| C8   | C5  | C6  | C1   | -132.0(5) | C19 | C27  | C28 | C29  | 155.3(13)  |
| C8   | C9  | C10 | C005 | -170.2(4) | C20 | C19  | C27 | C28  | 60.4(13)   |
| C8   | C9  | C10 | C11  | 8.5(7)    | C21 | C22  | C23 | C24  | -142.1(16) |
| C9   | C10 | C11 | C4   | 6.0(7)    | C22 | C23  | C24 | C26  | -15(2)     |
| C9   | C10 | C11 | C12  | -179.0(4) | C25 | C24  | C29 | C28  | -127.2(13) |

| A   | B    | C   | D   | Angle/°   | A   | B   | C   | D   | Angle/°   |
|-----|------|-----|-----|-----------|-----|-----|-----|-----|-----------|
| C10 | C005 | C14 | C13 | -56.0(5)  | C27 | C28 | C29 | C24 | 160.6(10) |
| C10 | C005 | C14 | C15 | 62.9(6)   | C30 | C24 | C29 | C28 | 18.3(16)  |
| C10 | C005 | C14 | C18 | -179.6(4) | O1  | C1  | C2  | C3  | 179.7(4)  |
| C10 | C005 | C16 | C17 | -165.4(4) | O1  | C1  | C6  | C5  | -175.6(4) |
| C10 | C11  | C12 | C13 | 5.0(7)    | O2  | C24 | C29 | C28 | 118.0(14) |

**Table S14** Hydrogen Atom Coordinates ( $\text{\AA} \times 10^4$ ) and Isotropic Displacement Parameters ( $\text{\AA}^2 \times 10^3$ ) for HOD<sub>2</sub>.

| Atom | <i>x</i> | <i>Y</i> | <i>z</i> | U(eq) |
|------|----------|----------|----------|-------|
| H1   | 3260.87  | 9238.57  | 904.25   | 65    |
| H2A  | 322.7    | 7356.66  | 997.97   | 63    |
| H2B  | 108.21   | 8976.25  | 976.12   | 63    |
| H3A  | -2.08    | 8230.02  | 1622.92  | 57    |
| H3B  | 1638.33  | 9244.7   | 1559.5   | 57    |
| H005 | 5100.98  | 8556.45  | 2718.36  | 53    |
| H6A  | 3508.95  | 6295.74  | 914.46   | 67    |
| H6B  | 5172.19  | 7305.3   | 870.67   | 67    |
| H7A  | 2421.5   | 5077.67  | 1743.83  | 81    |
| H7B  | 1340.78  | 5553.41  | 1374.23  | 81    |
| H7C  | 489.83   | 5756.32  | 1788.04  | 81    |
| H8   | 6882.17  | 7120.63  | 1418.16  | 54    |
| H9A  | 7164.06  | 7728.55  | 2069.89  | 57    |
| H9B  | 6655.48  | 6150.17  | 2069.97  | 57    |
| H12A | 410.26   | 7068.79  | 2335.26  | 54    |
| H12B | 643.41   | 8646.66  | 2240.79  | 54    |
| H13A | 1991.37  | 9104.47  | 2809.2   | 50    |
| H13B | 560.78   | 7973.5   | 2930.44  | 50    |
| H15A | 2537.17  | 5455.37  | 2619.88  | 93    |
| H15B | 1556.86  | 5500.84  | 3024.29  | 93    |
| H15C | 3627.98  | 5108.66  | 2999.24  | 93    |
| H16A | 7590.25  | 7229.13  | 2824.24  | 66    |
| H16B | 6462.69  | 5832.86  | 2806.96  | 66    |
| H17A | 6789.93  | 7596.11  | 3441.77  | 67    |

| <b>Atom</b> | <b>x</b>  | <b>Y</b> | <b>z</b> | <b>U(eq)</b> |
|-------------|-----------|----------|----------|--------------|
| H17B        | 6047.52   | 6061.46  | 3447.13  | 67           |
| H18         | 4014.4    | 8527.98  | 3370.31  | 59           |
| H19         | 2925      | 5792.4   | 3660(20) | 100(30)      |
| H20A        | 828.79    | 8355.29  | 3698.72  | 105          |
| H20B        | 374.01    | 7025.73  | 3942.86  | 105          |
| H20C        | 302.59    | 6969     | 3488.08  | 105          |
| H21A        | 5250.4    | 7619.18  | 4097.64  | 61           |
| H21B        | 3637.02   | 8671.75  | 4120.89  | 61           |
| H22A        | 2372.05   | 7519.19  | 4618.29  | 49           |
| H22         | 3880(90)  | 7480(70) | 4787(18) | 80(20)       |
| H23         | 5372.69   | 6237.74  | 4712.83  | 64           |
| H25A        | 3969.61   | 5019.99  | 5570.46  | 155          |
| H25B        | 3800.62   | 6531.06  | 5405.08  | 155          |
| H25C        | 5594.65   | 5678.34  | 5339.01  | 155          |
| H26A        | 709.01    | 4811.65  | 4900.53  | 87           |
| H26B        | 1143.38   | 6070.77  | 5173.84  | 87           |
| H26C        | 1258.39   | 4550.19  | 5334.43  | 87           |
| H27A        | 4789.75   | 7499.4   | 4029.89  | 35           |
| H27         | 4616.3    | 6165.9   | 3950     | 160(100)     |
| H28A        | 1971.87   | 5706.06  | 4353.33  | 50           |
| H28         | 3540(90)  | 4910(80) | 4290(19) | 80(20)       |
| H29         | 5349.72   | 5671.06  | 4509.74  | 47           |
| H30A        | 1309.69   | 4130.58  | 4686.47  | 78           |
| H30B        | 727.07    | 5512.77  | 4892.43  | 78           |
| H30C        | 973.4     | 4150.59  | 5136.08  | 78           |
| H1A         | 3375.65   | 8295.82  | 324.89   | 93           |
| H2          | 3860(100) | 3080(80) | 5120(20) | 90(20)       |

**Table S15** Atomic Occupancy for HOD<sub>2</sub>.

| Atom Occupancy |     | Atom Occupancy | Atom | Occupancy |
|----------------|-----|----------------|------|-----------|
| C21            | 0.6 | H21A 0.6       | H21B | 0.6       |
| C22            | 0.5 | H22A 0.5       | C23  | 0.5       |
| H23            | 0.5 | C26 0.5        | H26A | 0.5       |
| H26B 0.5       |     | H26C 0.5       | C27  | 0.4       |
| H27A 0.4       |     | H27 0.4        | C28  | 0.5       |
| H28A 0.5       |     | C29 0.5        | H29  | 0.5       |
| C30 0.5        |     | H30A 0.5       | H30B | 0.5       |
| H30C 0.5       |     |                |      |           |

Rearranged peroxide product HOPR<sub>2</sub>

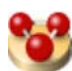

s-7r-1123.cif

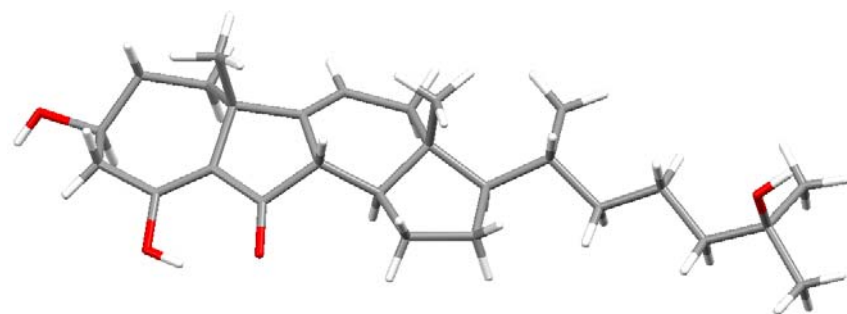

**Crystallography.** Single clear plate-shaped crystal of approximate dimension  $0.60 \times 0.07 \times 0.03 \text{ mm}^3$  was adhered to a Mitegen loop with Paratone oil. Crystallographic data were collected at temperature 149.99 K on a Rigaku-Oxford Diffraction XtaLAB-Synergy-S diffractometer with a Hypix-6000HE (Hybrid Photon Counting) detector, using Cu-K $\alpha$  radiation of wavelength 1.54187 Å. The intensity data were measured by a  $\omega$ -scan with 0.5° oscillations for each frame with the intensity that is more than 10:1 for data-to-parameter ratio. The program suite CrysAlis<sup>Pro</sup> was used for data collection, absorption correction, and data reduction. The structures were solved with the dual-space algorithm using SHELXT and were refined by full-matrix least-squares methods on  $F^2$  with SHELXL-2014 using the GUI Olex2<sup>[1]</sup>. The compound C<sub>27</sub>H<sub>42</sub>O<sub>4</sub> crystallized in the orthorhombic crystal system, with the space group  $P2_12_12_1$ . All non-hydrogen atoms were refined anisotropically. Hydrogen atoms were inserted at calculated positions or if possible based on difference Fourier analysis and refined with a riding model or without restrictions.



**Table S16** Crystal data and structure refinement

|                                                               |                                                                              |
|---------------------------------------------------------------|------------------------------------------------------------------------------|
| Crystal name                                                  | HORP <sub>2</sub>                                                            |
| Molecular Formula                                             | C <sub>27</sub> H <sub>42</sub> O <sub>4</sub>                               |
| Formula Weight                                                | 430.60                                                                       |
| Temperature [K]                                               | 149.99(10)                                                                   |
| Crystal System                                                | orthorhombic                                                                 |
| Space Group                                                   | <i>P</i> 2 <sub>1</sub> 2 <sub>1</sub> 2 <sub>1</sub>                        |
| <i>a</i> [Å]                                                  | 7.52147(13)                                                                  |
| <i>b</i> [Å]                                                  | 9.40295(17)                                                                  |
| <i>c</i> [Å]                                                  | 35.0317(6)                                                                   |
| [°]                                                           | 90                                                                           |
| [°]                                                           | 90                                                                           |
| [°]                                                           | 90                                                                           |
| <i>V</i> [Å <sup>3</sup> ]                                    | 2477.59(8)                                                                   |
| <i>Z</i>                                                      | 4                                                                            |
| $\rho_{\text{calc}}$ [g/cm <sup>3</sup> ]                     | 1.154                                                                        |
| $\mu$ /mm <sup>-1</sup>                                       | 0.593                                                                        |
| <i>F</i> (000)                                                | 944.0                                                                        |
| Crystal size [mm <sup>3</sup> ]                               | 0.596 × 0.069 × 0.029                                                        |
| Radiation                                                     | Cu K $\alpha$ ( $\lambda$ = 1.54184)                                         |
| 2 $\theta$ range for data collection [°]                      | 5.046 to 160.658                                                             |
| Index ranges                                                  | -9 ≤ <i>h</i> ≤ 9, -9 ≤ <i>k</i> ≤ 11, -44 ≤ <i>l</i> ≤ 38                   |
| Reflections collected                                         | 25536                                                                        |
| Independent reflections                                       | 5225 [ <i>R</i> <sub>int</sub> = 0.0647, <i>R</i> <sub>sigma</sub> = 0.0443] |
| Data/restraints/parameters                                    | 5225/0/289                                                                   |
| Goodness-of-fit on <i>F</i> <sup>2</sup>                      | 1.060                                                                        |
| Final <i>R</i> indexes [ <i>I</i> >= 2 $\sigma$ ( <i>I</i> )] | <i>R</i> 1 = 0.0511, <i>wR</i> <sub>2</sub> = 0.1308                         |
| Final <i>R</i> indexes [all data]                             | <i>R</i> 1 = 0.0563, <i>wR</i> <sub>2</sub> = 0.1375                         |
| Largest diff. peak/hole / e Å <sup>-3</sup>                   | 0.36/-0.22                                                                   |
| Flack parameter                                               | 0.2(3)                                                                       |

**Table S17** Fractional Atomic Coordinates ( $\times 10^4$ ) and Equivalent Isotropic Displacement Parameters ( $\text{\AA}^2 \times 10^3$ ) for HOP<sub>2</sub>.  $U_{\text{eq}}$  is defined as 1/3 of the trace of the orthogonalised  $U_{ij}$  tensor.

| <b>Atom</b> | <b>X</b> | <b>y</b> | <b>z</b>  | <b>U(eq)</b> |
|-------------|----------|----------|-----------|--------------|
| O1          | 8570(3)  | 2325(2)  | 473.7(5)  | 36.3(5)      |
| O2          | 3574(2)  | 3765(3)  | 1142.2(6) | 42.7(5)      |
| O4          | 4127(3)  | 6205(2)  | 4966.5(5) | 34.9(4)      |
| C1          | 7874(4)  | 2477(3)  | 851.6(8)  | 31.5(6)      |
| C2          | 9458(3)  | 2857(3)  | 1101.9(8) | 29.1(5)      |
| C3          | 9110(3)  | 2889(3)  | 1533.3(7) | 26.8(5)      |
| C4          | 7934(3)  | 4091(3)  | 1685.4(7) | 25.6(5)      |
| C5          | 5995(3)  | 4022(3)  | 1555.7(7) | 26.7(5)      |
| C6          | 5338(3)  | 3783(3)  | 1201.0(8) | 31.0(6)      |
| C7          | 6376(4)  | 3573(4)  | 840.5(8)  | 35.9(6)      |
| C8          | 8749(4)  | 5557(3)  | 1588.8(8) | 32.1(6)      |
| C9          | 7676(3)  | 4000(3)  | 2118.5(7) | 25.6(5)      |
| C10         | 5886(3)  | 4630(3)  | 2221.6(7) | 25.5(5)      |
| C11         | 4808(3)  | 4326(3)  | 1867.1(8) | 26.7(5)      |
| C12         | 8694(3)  | 3350(3)  | 2376.0(8) | 30.1(5)      |
| C13         | 8222(3)  | 3213(3)  | 2794.6(8) | 31.6(6)      |
| C14         | 6658(3)  | 4167(3)  | 2911.7(7) | 25.5(5)      |
| C15         | 5212(3)  | 4044(3)  | 2598.4(7) | 25.5(5)      |
| C16         | 3545(4)  | 4708(3)  | 2770.9(8) | 34.0(6)      |
| C17         | 3713(4)  | 4392(3)  | 3201.7(8) | 32.0(6)      |
| C18         | 5567(3)  | 3701(3)  | 3268.6(8) | 27.4(5)      |
| C19         | 7303(4)  | 5703(3)  | 2955.2(9) | 36.4(6)      |
| C20         | 8130(5)  | 3402(5)  | 3744.4(9) | 53.6(10)     |
| C21         | 6298(4)  | 4059(3)  | 3667.7(7) | 33.3(6)      |
| C22         | 4972(4)  | 3594(3)  | 3977.6(8) | 36.3(6)      |
| C23         | 5292(4)  | 4280(3)  | 4368.0(8) | 34.7(6)      |
| C24         | 3736(4)  | 4019(3)  | 4635.6(8) | 33.8(6)      |
| C25         | 3875(4)  | 4710(3)  | 5031.6(8) | 33.1(6)      |
| C26         | 5415(5)  | 4099(3)  | 5258.6(9) | 41.9(7)      |
| C27         | 2124(4)  | 4498(4)  | 5247.8(9) | 43.2(7)      |
| O3          | 3156(2)  | 4374(2)  | 1849.0(6) | 35.5(5)      |

**Table S18** Anisotropic Displacement Parameters ( $\text{\AA}^2 \times 10^3$ ) for HORP<sub>2</sub>. The Anisotropic displacement factor exponent takes the form:  $-2\pi^2[h^2a^{*2}U_{11}+2hka^*b^*U_{12}+\dots]$ .

| Atom | $U_{11}$ | $U_{22}$ | $U_{33}$ | $U_{23}$ | $U_{13}$ | $U_{12}$ |
|------|----------|----------|----------|----------|----------|----------|
| O1   | 28.7(9)  | 53.9(12) | 26.3(9)  | -4.5(9)  | 0.3(8)   | -7.7(9)  |
| O2   | 15.7(8)  | 82.4(16) | 30.1(10) | 2.4(11)  | -5.3(8)  | -1.0(9)  |
| O4   | 38.7(10) | 37.5(10) | 28.7(9)  | -4.0(8)  | -7.7(8)  | 2.5(8)   |
| C1   | 25.9(12) | 42.3(14) | 26.2(13) | -0.8(11) | -1.3(10) | -5.7(11) |
| C2   | 19.8(11) | 36.9(13) | 30.5(13) | -0.9(11) | 0.0(10)  | -1.2(10) |
| C3   | 19.6(11) | 31.1(12) | 29.7(13) | 0.7(10)  | -1.0(9)  | 0.1(9)   |
| C4   | 16.4(10) | 33.1(12) | 27.5(12) | 1.8(10)  | -2.9(9)  | 0.5(9)   |
| C5   | 17.6(10) | 32.2(12) | 30.3(13) | 4.3(10)  | -0.7(9)  | -1.2(9)  |
| C6   | 16.4(11) | 44.8(15) | 31.8(14) | 5.6(12)  | -2.5(10) | -1.5(10) |
| C7   | 24.2(12) | 58.6(18) | 24.9(12) | 2.7(12)  | -2.5(11) | -0.7(12) |
| C8   | 25.7(12) | 35.8(13) | 34.9(14) | 2.1(11)  | 1.0(11)  | -3.5(11) |
| C9   | 18.3(11) | 29.2(11) | 29.4(13) | -2.0(10) | 0.5(9)   | -0.9(9)  |
| C10  | 19.3(11) | 27.5(11) | 29.7(12) | 2.0(10)  | 0.1(10)  | 0.8(9)   |
| C11  | 19.5(11) | 29.7(12) | 30.9(13) | 4.2(10)  | -1.2(10) | 0.7(9)   |
| C12  | 19.5(11) | 42.0(14) | 28.7(12) | -2.1(11) | -1.7(10) | 4.0(10)  |
| C13  | 22.0(11) | 45.9(15) | 27.0(13) | 0.4(11)  | -1.8(10) | 8.8(11)  |
| C14  | 20.1(11) | 29.9(12) | 26.5(12) | -2.3(10) | -1.6(9)  | 2.0(9)   |
| C15  | 17.7(10) | 29.9(12) | 29.0(13) | -0.1(10) | -1.3(9)  | -0.8(9)  |
| C16  | 19.9(11) | 47.3(15) | 34.8(14) | -0.5(12) | 2.2(11)  | 5.4(11)  |
| C17  | 23.2(12) | 38.0(13) | 34.8(14) | -2.5(11) | 3.1(10)  | 2.0(11)  |
| C18  | 25.5(12) | 28.0(11) | 28.6(12) | -3.2(10) | 1.6(10)  | 1.4(10)  |
| C19  | 34.8(14) | 38.8(14) | 35.6(15) | -3.2(12) | -1.0(12) | -8.2(12) |
| C20  | 36.8(16) | 95(3)    | 28.7(14) | -4.3(16) | -2.5(13) | 20.3(18) |
| C21  | 30.4(13) | 44.5(15) | 24.9(12) | -3.8(11) | 1.1(11)  | 0.6(12)  |
| C22  | 38.2(15) | 41.2(15) | 29.6(14) | -3.4(12) | 0.2(12)  | -1.1(12) |
| C23  | 34.5(14) | 41.1(15) | 28.5(13) | -2.4(11) | 1.0(11)  | -0.1(12) |
| C24  | 33.0(13) | 40.9(14) | 27.6(13) | -2.9(11) | -0.9(11) | -1.0(12) |
| C25  | 34.4(14) | 39.1(14) | 25.9(13) | -1.8(11) | 0.8(11)  | 1.8(11)  |
| C26  | 50.8(17) | 42.3(15) | 32.5(15) | -2.6(13) | -8.4(13) | 9.7(14)  |
| C27  | 44.0(17) | 51.7(17) | 33.8(15) | -5.8(14) | 9.1(13)  | -2.2(14) |
| O3   | 16.3(8)  | 55.0(12) | 35.3(10) | 4.0(9)   | -1.2(7)  | 4.0(8)   |

**Table S19** Bond Lengths for HORP<sub>2</sub>.

| Atom Atom Length/Å |     |          | Atom Atom Length/Å |     |          |
|--------------------|-----|----------|--------------------|-----|----------|
| O1                 | C1  | 1.431(3) | C11                | O3  | 1.245(3) |
| O2                 | C6  | 1.342(3) | C12                | C13 | 1.515(4) |
| O4                 | C25 | 1.437(4) | C13                | C14 | 1.535(3) |
| C1                 | C2  | 1.522(4) | C14                | C15 | 1.550(3) |
| C1                 | C7  | 1.528(4) | C14                | C18 | 1.559(4) |
| C2                 | C3  | 1.534(4) | C14                | C19 | 1.531(4) |
| C3                 | C4  | 1.531(4) | C15                | C16 | 1.526(4) |
| C4                 | C5  | 1.529(3) | C16                | C17 | 1.543(4) |
| C4                 | C8  | 1.546(4) | C17                | C18 | 1.556(4) |
| C4                 | C9  | 1.532(4) | C18                | C21 | 1.540(4) |
| C5                 | C6  | 1.356(4) | C20                | C21 | 1.534(4) |
| C5                 | C11 | 1.439(4) | C21                | C22 | 1.538(4) |
| C6                 | C7  | 1.498(4) | C22                | C23 | 1.531(4) |
| C9                 | C10 | 1.514(3) | C23                | C24 | 1.519(4) |
| C9                 | C12 | 1.331(4) | C24                | C25 | 1.535(4) |
| C10                | C11 | 1.510(4) | C25                | C26 | 1.517(4) |
| C10                | C15 | 1.517(4) | C25                | C27 | 1.532(4) |

**Table S20** Bond Angles for HORP<sub>2</sub>.

| Atom | Atom | Atom | Angle/°   | Atom | Atom | Atom | Angle/°    |
|------|------|------|-----------|------|------|------|------------|
| O1   | C1   | C2   | 105.7(2)  | C12  | C13  | C14  | 112.8(2)   |
| O1   | C1   | C7   | 108.3(2)  | C13  | C14  | C15  | 107.8(2)   |
| C2   | C1   | C7   | 115.7(2)  | C13  | C14  | C18  | 117.0(2)   |
| C1   | C2   | C3   | 116.0(2)  | C15  | C14  | C18  | 100.22(19) |
| C4   | C3   | C2   | 117.1(2)  | C19  | C14  | C13  | 109.6(2)   |
| C3   | C4   | C8   | 110.7(2)  | C19  | C14  | C15  | 111.3(2)   |
| C3   | C4   | C9   | 112.1(2)  | C19  | C14  | C18  | 110.6(2)   |
| C5   | C4   | C3   | 114.6(2)  | C10  | C15  | C14  | 110.8(2)   |
| C5   | C4   | C8   | 110.6(2)  | C10  | C15  | C16  | 118.1(2)   |
| C5   | C4   | C9   | 99.85(19) | C16  | C15  | C14  | 105.4(2)   |
| C9   | C4   | C8   | 108.5(2)  | C15  | C16  | C17  | 104.0(2)   |
| C6   | C5   | C4   | 128.9(2)  | C16  | C17  | C18  | 107.5(2)   |
| C6   | C5   | C11  | 120.1(2)  | C17  | C18  | C14  | 103.5(2)   |
| C11  | C5   | C4   | 111.0(2)  | C21  | C18  | C14  | 118.6(2)   |
| O2   | C6   | C5   | 120.2(2)  | C21  | C18  | C17  | 111.5(2)   |
| O2   | C6   | C7   | 112.6(2)  | C20  | C21  | C18  | 113.1(2)   |
| C5   | C6   | C7   | 127.2(2)  | C20  | C21  | C22  | 110.2(3)   |
| C6   | C7   | C1   | 116.9(2)  | C22  | C21  | C18  | 110.3(2)   |
| C10  | C9   | C4   | 109.1(2)  | C23  | C22  | C21  | 114.2(2)   |
| C12  | C9   | C4   | 128.6(2)  | C24  | C23  | C22  | 111.3(2)   |
| C12  | C9   | C10  | 122.0(2)  | C23  | C24  | C25  | 115.9(2)   |
| C9   | C10  | C15  | 111.2(2)  | O4   | C25  | C24  | 106.2(2)   |
| C11  | C10  | C9   | 102.0(2)  | O4   | C25  | C26  | 110.7(2)   |
| C11  | C10  | C15  | 117.9(2)  | O4   | C25  | C27  | 108.6(2)   |
| C5   | C11  | C10  | 109.1(2)  | C26  | C25  | C24  | 111.4(2)   |
| O3   | C11  | C5   | 126.0(3)  | C26  | C25  | C27  | 110.3(3)   |
| O3   | C11  | C10  | 124.8(2)  | C27  | C25  | C24  | 109.4(2)   |
| C9   | C12  | C13  | 124.1(2)  |      |      |      |            |

**Table S21** Torsion Angles for HORP<sub>2</sub>.

| A  | B  | C   | D   | Angle/°   | A   | B   | C   | D   | Angle/°   |
|----|----|-----|-----|-----------|-----|-----|-----|-----|-----------|
| O1 | C1 | C2  | C3  | -172.2(2) | C11 | C5  | C6  | O2  | -3.1(4)   |
| O1 | C1 | C7  | C6  | 173.9(2)  | C11 | C5  | C6  | C7  | 174.5(3)  |
| O2 | C6 | C7  | C1  | -132.0(3) | C11 | C10 | C15 | C14 | 167.7(2)  |
| C1 | C2 | C3  | C4  | -69.7(3)  | C11 | C10 | C15 | C16 | -70.7(3)  |
| C2 | C1 | C7  | C6  | -67.7(3)  | C12 | C9  | C10 | C11 | -143.7(3) |
| C2 | C3 | C4  | C5  | 66.7(3)   | C12 | C9  | C10 | C15 | -17.2(3)  |
| C2 | C3 | C4  | C8  | -59.2(3)  | C12 | C13 | C14 | C15 | 43.8(3)   |
| C2 | C3 | C4  | C9  | 179.6(2)  | C12 | C13 | C14 | C18 | 155.6(2)  |
| C3 | C4 | C5  | C6  | -46.1(4)  | C12 | C13 | C14 | C19 | -77.5(3)  |
| C3 | C4 | C5  | C11 | 137.0(2)  | C13 | C14 | C15 | C10 | -64.5(3)  |
| C3 | C4 | C9  | C10 | -150.5(2) | C13 | C14 | C15 | C16 | 166.7(2)  |
| C3 | C4 | C9  | C12 | 22.3(4)   | C13 | C14 | C18 | C17 | -154.8(2) |
| C4 | C5 | C6  | O2  | -179.8(3) | C13 | C14 | C18 | C21 | 81.1(3)   |
| C4 | C5 | C6  | C7  | -2.2(5)   | C14 | C15 | C16 | C17 | -31.2(3)  |
| C4 | C5 | C11 | C10 | 0.5(3)    | C14 | C18 | C21 | C20 | -59.7(3)  |
| C4 | C5 | C11 | O3  | 178.7(3)  | C14 | C18 | C21 | C22 | 176.4(2)  |
| C4 | C9 | C10 | C11 | 29.7(2)   | C15 | C10 | C11 | C5  | -140.2(2) |
| C4 | C9 | C10 | C15 | 156.2(2)  | C15 | C10 | C11 | O3  | 41.6(4)   |
| C4 | C9 | C12 | C13 | -174.1(2) | C15 | C14 | C18 | C17 | -38.8(2)  |
| C5 | C4 | C9  | C10 | -28.8(2)  | C15 | C14 | C18 | C21 | -162.8(2) |
| C5 | C4 | C9  | C12 | 144.1(3)  | C15 | C16 | C17 | C18 | 6.0(3)    |
| C5 | C6 | C7  | C1  | 50.3(4)   | C16 | C17 | C18 | C14 | 21.0(3)   |
| C6 | C5 | C11 | C10 | -176.7(2) | C16 | C17 | C18 | C21 | 149.5(2)  |
| C6 | C5 | C11 | O3  | 1.4(4)    | C17 | C18 | C21 | C20 | -179.7(3) |
| C7 | C1 | C2  | C3  | 67.9(3)   | C17 | C18 | C21 | C22 | 56.4(3)   |
| C8 | C4 | C5  | C6  | 79.8(3)   | C18 | C14 | C15 | C10 | 172.8(2)  |
| C8 | C4 | C5  | C11 | -97.2(3)  | C18 | C14 | C15 | C16 | 43.9(2)   |
| C8 | C4 | C9  | C10 | 87.0(2)   | C18 | C21 | C22 | C23 | -162.7(3) |
| C8 | C4 | C9  | C12 | -100.2(3) | C19 | C14 | C15 | C10 | 55.7(3)   |
| C9 | C4 | C5  | C6  | -166.1(3) | C19 | C14 | C15 | C16 | -73.1(3)  |
| C9 | C4 | C5  | C11 | 17.0(3)   | C19 | C14 | C18 | C17 | 78.8(3)   |

| A   | B   | C   | D   | Angle/°   | A   | B   | C   | D   | Angle/°   |
|-----|-----|-----|-----|-----------|-----|-----|-----|-----|-----------|
| C9  | C10 | C11 | C5  | -18.1(3)  | C19 | C14 | C18 | C21 | -45.3(3)  |
| C9  | C10 | C11 | O3  | 163.7(3)  | C20 | C21 | C22 | C23 | 71.7(3)   |
| C9  | C10 | C15 | C14 | 50.5(3)   | C21 | C22 | C23 | C24 | 168.3(3)  |
| C9  | C10 | C15 | C16 | 172.1(2)  | C22 | C23 | C24 | C25 | -177.7(2) |
| C9  | C12 | C13 | C14 | -12.4(4)  | C23 | C24 | C25 | O4  | 56.3(3)   |
| C10 | C9  | C12 | C13 | -2.1(4)   | C23 | C24 | C25 | C26 | -64.3(3)  |
| C10 | C15 | C16 | C17 | -155.6(2) | C23 | C24 | C25 | C27 | 173.4(3)  |

**Table S22** Hydrogen Atom Coordinates ( $\text{\AA} \times 10^4$ ) and Isotropic Displacement Parameters ( $\text{\AA}^2 \times 10^3$ ) for HORP<sub>2</sub>.

| Atom | x     | y    | z    | U(eq) |
|------|-------|------|------|-------|
| H1   | 7828  | 1894 | 337  | 54    |
| H2   | 3047  | 3980 | 1346 | 64    |
| H4   | 4589  | 6577 | 5161 | 52    |
| H1A  | 7379  | 1543 | 937  | 38    |
| H2A  | 9899  | 3805 | 1023 | 35    |
| H2B  | 10419 | 2163 | 1051 | 35    |
| H3A  | 8556  | 1973 | 1606 | 32    |
| H3B  | 10273 | 2944 | 1665 | 32    |
| H7A  | 6894  | 4501 | 766  | 43    |
| H7B  | 5534  | 3293 | 637  | 43    |
| H8A  | 8661  | 5726 | 1313 | 48    |
| H8B  | 10002 | 5570 | 1666 | 48    |
| H8C  | 8102  | 6302 | 1726 | 48    |
| H10  | 6024  | 5683 | 2247 | 31    |
| H12  | 9784  | 2948 | 2292 | 36    |
| H13A | 9274  | 3464 | 2950 | 38    |
| H13B | 7915  | 2210 | 2850 | 38    |
| H15  | 4965  | 3009 | 2560 | 31    |
| H16A | 2458  | 4268 | 2664 | 41    |
| H16B | 3509  | 5745 | 2723 | 41    |
| H17A | 2759  | 3734 | 3284 | 38    |
| H17B | 3608  | 5283 | 3350 | 38    |

| Atom | x    | y    | z    | U(eq) |
|------|------|------|------|-------|
| H18  | 5411 | 2646 | 3255 | 33    |
| H19A | 8137 | 5763 | 3170 | 55    |
| H19B | 6283 | 6326 | 3004 | 55    |
| H19C | 7901 | 6003 | 2720 | 55    |
| H20A | 8065 | 2369 | 3712 | 80    |
| H20B | 8499 | 3622 | 4006 | 80    |
| H20C | 8998 | 3797 | 3564 | 80    |
| H21  | 6426 | 5116 | 3684 | 40    |
| H22A | 3755 | 3833 | 3892 | 44    |
| H22B | 5039 | 2548 | 4006 | 44    |
| H23A | 6388 | 3882 | 4482 | 42    |
| H23B | 5465 | 5316 | 4335 | 42    |
| H24A | 3601 | 2980 | 4670 | 41    |
| H24B | 2641 | 4372 | 4511 | 41    |
| H26A | 6537 | 4333 | 5131 | 63    |
| H26B | 5288 | 3064 | 5275 | 63    |
| H26C | 5412 | 4506 | 5516 | 63    |
| H27A | 2186 | 4988 | 5494 | 65    |
| H27B | 1925 | 3480 | 5290 | 65    |
| H27C | 1141 | 4889 | 5097 | 65    |

## Reference

1. O.V. Dolomanov and L.J. Bourhis and R.J. Gildea and J.A.K. Howard and H. Puschmann, Olex2: A complete structure solution, refinement and analysis program, *J. Appl. Cryst.*, (2009), **42**, 339-341.
